# Supplementary material for: Molecular fingerprints and health risks of home-use incense burning smoke
Source: Copernicus journal article supplement (doi:10.5194/egusphere-2023-1225), 2023-06-13
Supplement: Supplementary file 1 [file egusphere-2023-1225-supplement.pdf]

1 **Supplementary Information *Molecular fingerprints and health risks of***  
2 ***home-use incense burning smoke***

3 Kai Song<sup>1,2,#</sup>, Rongzhi Tang<sup>3,4,#,\*</sup>, Jingshun Zhang<sup>5</sup>, Zichao Wan<sup>1</sup>, Yuan Zhang<sup>6</sup>, Kun Hu<sup>1</sup>, Yuanzheng  
4 Gong<sup>1</sup>, Daqi Lv<sup>1</sup>, Sihua Lu<sup>1</sup>, Yu Tan<sup>7</sup>, Ruifeng Zhang<sup>3,4</sup>, Ang Li<sup>8</sup>, Shuyuan Yan<sup>8</sup>, Shichao Yan<sup>8</sup>,  
5 Baoming Fan<sup>9</sup>, Wenfei Zhu<sup>10</sup>, Chak K. Chan<sup>3,4</sup>, Song Guo<sup>1,2,\*</sup>

6

7 <sup>1</sup> State Key Joint Laboratory of Environmental Simulation and Pollution Control, International Joint  
8 Laboratory for Regional Pollution Control, Ministry of Education (IJRC), College of Environmental  
9 Sciences and Engineering, Peking University, *Beijing* 100871, China

10 <sup>2</sup> Collaborative Innovation Center of Atmospheric Environment and Equipment Technology, Nanjing  
11 University of Information Science & Technology, *Nanjing* 210044, China

12 <sup>3</sup> School of Energy and Environment, City University of Hong Kong, *Kowloon* 999077, Hong Kong,  
13 China

14 <sup>4</sup> Shenzhen Research Institute, City University of Hong Kong, *Shenzhen* 518057, China

15 <sup>5</sup> Shanghai Police College, *Shanghai* 200137, China

16 <sup>6</sup> School of Earth Science and Engineering, Hebei University of Engineering, *Handan* 056038, China

17 <sup>7</sup> School of Chemical Engineering and Technology, Sun-Yat-Sen University, *Zhuhai* 519000, China

18 <sup>8</sup> China Automotive Technology and Research Center (CATARC), *Beijing* 100176, China

19 <sup>9</sup> TECHSHIP (Beijing) Technology Co., LTD, *Beijing* 100039, China

20 <sup>10</sup> School of Energy and Power Engineering, University of Shanghai for Science and Technology,  
21 *Shanghai* 200093, China

22

23 # These authors contribute equally to this work.

24 \* **Correspondence:** Rongzhi Tang: rongtang@cityu.edu.hk and Song Guo: songguo@pku.edu.cn

25

26 s

27 **Texts**

28 **Text S1. Arctic contamination potential (ACP) assessment.**

29 The partition coefficients of chemical compounds fall in the range of ( $-0.5 < \log K_{a-w} < 4$  &  $\log$   
30  $K_{o-a} < 9$ ) or ( $-3 < \log K_{a-w}$  &  $6.5 < \log K_{o-a} < 10$ ) are regarded as of high arctic contamination  
31 potential (ACP) concern (Zushi et al., 2019). Chemicals with high ACP are listed in Figure S15.  
32 Acetic acid, 1-hydroxy-2-propanone, 3-penten-2-one, 1-methyl-1H-pyrazole, benzenes (toluene,  
33 ethylbenzene, and xylenes), 2-furanmethanol, linalool, limonene, benzoic acid 2-ethylhexyl ester,  
34 and C15 – C21 *n* and *b*-alkanes are high ACP compounds (Figure S15).

35

36 **Tables**

37 **Table S1.** Detailed instrumentation parameters of TD-GC ×GC-qMS.

38 **Table S2.** Calibration curves of the external standards.

39 **Table S3.** Chemicals quantified, with volatility and polarity bins, MIR, *k*OH, and SOA yields.

40 **Table S4.** Emission factors ( $\mu\text{g g}^{-1}$ ) of selected compounds in this study and comparison with other  
41 incense burning studies.

42

43 **Table S1.** Detailed instrumentation parameters of TD-GC×GC-qMS.

| <b>TDS</b>          |                                                                                                                               | <b>CIS</b>          |                              |
|---------------------|-------------------------------------------------------------------------------------------------------------------------------|---------------------|------------------------------|
| Carrier gas         | He, 50 mL/min                                                                                                                 | Initial temperature | 20 °C                        |
| Split/splitless     | splitless                                                                                                                     | Split/splitless     | Split, ratio = 15            |
| Temperature program | 30°C_60°C/min_280°C<br>(10 min)                                                                                               | Temperature program | 20°C_12°C/s_320°C<br>(5 min) |
| <b>GC×GC</b>        |                                                                                                                               | <b>qMS</b>          |                              |
| Carrier gas         | He, 1.0 mL/min                                                                                                                | Ion source          | EI (70 eV, 230 °C)           |
| Columns             | <b>1<sup>st</sup></b> Shimadzu SH-Rxi-1ms (30 m × 0.25 mm × 0.25 μm)<br><b>2<sup>nd</sup></b> BPX50 (2.5 m × 0.1 mm × 0.1 μm) | Mode                | TIC                          |
| Temperature program | 50 °C(5min)_3 °C/min_250 °C(5min)_10 °C/min_300 °C(20 min)                                                                    | Mass range          | 33-500 amu                   |

44 **Table S2.** Calibration curves of the external standards.

| compound                                  | class_detail | retention1 | retention2 | response        | slope      | intercept  | r_square | slope_lowest | response_lowest |
|-------------------------------------------|--------------|------------|------------|-----------------|------------|------------|----------|--------------|-----------------|
| Benzonitrile                              | nitriles     | 14.8       | 1.62       | Quantifier(103) | 248994.996 | -1030650.5 | 0.997891 | 6.37507E-06  | quantifier      |
| Styrene                                   | aromatics    | 12.2       | 0.93       | Quantifier(104) | 120819.674 | -94133.385 | 0.99244  | 1.10779E-05  | quantifier      |
| Acetic acid, 2-phenylethyl ester          | esters       | 23.4       | 1.29       | Quantifier(104) | 321753.949 | 80735.9534 | 0.997878 | 3.17118E-06  | quantifier      |
| Benzene, (1-methylethyl)-                 | aromatics    | 13.4       | 0.78       | Quantifier(105) | 229105.896 | -749484.52 | 0.988508 | 7.14837E-06  | quantifier      |
| Benzyl Benzoate                           | esters       | 35.6       | 1.89       | Quantifier(105) | 360507.357 | -902951.99 | 0.998724 | 4.19147E-06  | quantifier      |
| Acetophenone                              | ketones      | 17.7       | 1.5        | Quantifier(105) | 286297.664 | -155506.46 | 0.984967 | 3.89734E-06  | quantifier      |
| Acetic acid, phenylmethyl ester           | esters       | 20.7       | 1.32       | Quantifier(108) | 223813.137 | -756200.65 | 0.989638 | 7.52782E-06  | quantifier      |
| Phenol, 3-methyl-                         | phenols      | 18.3       | 1.2        | Quantifier(108) | 358479.616 | 896822.628 | 0.994235 | 2.15997E-06  | quantifier      |
| Phenol, 2-methyl-                         | phenols      | 19.8       | 0.96       | Quantifier(108) | 228150.221 | -3560249   | 0.978509 | 1.12132E-05  | quantifier      |
| Ethane, hexachloro-                       | halocarbons  | 18.4       | 0.93       | Quantifier(117) | 34274.7698 | 205153.834 | 0.97634  | 2.00249E-05  | quantifier      |
| Indole                                    | indoles      | 24.4       | 2.1        | Quantifier(117) | 362498.345 | -1648500.4 | 0.997581 | 5.0784E-06   | quantifier      |
| p-Chloroaniline                           | others       | 21.9       | 1.8        | Quantifier(127) | 143633.14  | -473328.4  | 0.998068 | 9.19422E-06  | quantifier      |
| Naphthalene                               | PAHs         | 21.6       | 1.44       | Quantifier(128) | 299143.85  | 7078753.5  | 0.988491 | 1.57341E-06  | quantifier      |
| Phenol, 2-chloro-                         | phenols      | 15.6       | 1.14       | Quantifier(128) | 95238.115  | -486162.9  | 0.994018 | 1.61046E-05  | quantifier      |
| Phenol, 4-chloro-                         | phenols      | 22.2       | 1.32       | Quantifier(128) | 238199.115 | -818513.4  | 0.998537 | 4.80132E-06  | quantifier      |
| Hexanedioic acid, bis(2-ethylhexyl) ester | esters       | 47.2       | 1.2        | Quantifier(129) | 193866.316 | -1630739.1 | 0.979979 | 1.98014E-05  | quantifier      |
| Quinoline                                 | others       | 23         | 1.8        | Quantifier(129) | 419799.88  | -1522343.3 | 0.997264 | 3.72402E-06  | quantifier      |
| Benzeneethanol, dimethyl-, acetate        | esters       | 25.3       | 1.02       | Quantifier(132) | 124525.261 | -323795.24 | 0.999203 | 1.23189E-05  | quantifier      |
| Benzothiazole                             | thiazoles    | 22.4       | 2.04       | Quantifier(135) | 451895.164 | 53866567   | 0.868748 | 3.39858E-07  | quantifier      |
| Phenol, 2-nitro-                          | phenols      | 19.8       | 1.44       | Quantifier(139) | 46861.0462 | -432734.46 | 0.99981  | 3.79603E-05  | quantifier      |
| Naphthalene, 2-methyl-                    | PAHs         | 24.8       | 1.35       | Quantifier(142) | 236865.4   | 5523543    | 0.987994 | 2.15125E-06  | quantifier      |
| 1-Naphthalenol                            | phenols      | 30.1       | 1.98       | Quantifier(144) | 161299.719 | -1716279.6 | 0.994577 | 1.03691E-05  | quantifier      |
| 2-Naphthalenol                            | phenols      | 30.3       | 2.04       | Quantifier(144) | 363638.135 | -2671808.5 | 0.992284 | 3.46363E-06  | quantifier      |

|                                                            |                 |      |      |                 |            |            |          |             |            |
|------------------------------------------------------------|-----------------|------|------|-----------------|------------|------------|----------|-------------|------------|
| Benzene, 1,3-dichloro-                                     | halocarbons     | 15.9 | 1.05 | Quantifier(146) | 72130.403  | 497848.447 | 0.969565 | 8.0583E-06  | quantifier |
| Benzene, 1,4-dichloro-                                     | halocarbons     | 16.1 | 1.08 | Quantifier(146) | 128297.283 | 144536.547 | 0.976931 | 5.7832E-06  | quantifier |
| Benzene, 1,2-dichloro-                                     | halocarbons     | 16.9 | 1.14 | Quantifier(146) | 112626.282 | 294316.377 | 0.988771 | 6.43652E-06 | quantifier |
| Pyridine, 3,5-dichloro-                                    | Pyridines       | 15.9 | 1.08 | Quantifier(147) | 146161.53  | -456122.52 | 0.997571 | 9.8031E-06  | quantifier |
| Diethyl Phthalate                                          | esters          | 31.7 | 1.65 | Quantifier(149) | 134313.619 | 375738.923 | 0.98491  | 5.69326E-06 | quantifier |
| 1,2-Benzenedicarboxylic acid,<br>bis(2-methylpropyl) ester | esters          | 37.5 | 1.38 | Quantifier(149) | 307433.707 | 8253485.18 | 0.991862 | 1.44136E-06 | quantifier |
| Dibutyl phthalate                                          | esters          | 39.3 | 1.47 | Quantifier(149) | 237452.714 | 5072697.77 | 0.999901 | 2.04197E-06 | quantifier |
| Benzyl butyl phthalate                                     | esters          | 45.9 | 2.58 | Quantifier(149) | 140822.204 | -124237.75 | 0.994786 | 7.73961E-06 | quantifier |
| Bis(2-ethylhexyl) phthalate                                | esters          | 50.2 | 2.22 | Quantifier(149) | 219340.444 | -131055.27 | 0.995097 | 4.66365E-06 | quantifier |
| Di-N-octyl phthalate                                       | esters          | 53.6 | 1.56 | Quantifier(149) | 339861.949 | -1224278.1 | 0.994692 | 3.50596E-06 | quantifier |
| Acenaphthylene                                             | PAHs            | 28.6 | 1.83 | Quantifier(152) | 303847.136 | 5053784    | 0.983424 | 1.957E-06   | quantifier |
| Acenaphthene                                               | PAHs            | 29.5 | 1.74 | Quantifier(153) | 121532.983 | 4365923.15 | 0.994059 | 2.99039E-06 | quantifier |
| Biphenyl                                                   | PAHs            | 26.9 | 1.47 | Quantifier(154) | 296508.489 | 1457408.82 | 0.984094 | 2.39984E-06 | quantifier |
| Naphthalene, 2-chloro-                                     | halocarbons     | 26.8 | 1.53 | Quantifier(162) | 154533.698 | 3918104.46 | 0.990002 | 2.92849E-06 | quantifier |
| Phenol, 2,4-dichloro-                                      | phenols         | 21.3 | 1.2  | Quantifier(162) | 179169.06  | -1379638.5 | 0.988449 | 6.5718E-06  | quantifier |
| Dimethyl phthalate                                         | esters          | 28.4 | 1.86 | Quantifier(163) | 183210.783 | 704428.175 | 0.984511 | 4.41416E-06 | quantifier |
| Benzene, 2-methyl-1,3-dinitro-                             | nitro-aromatics | 28.1 | 2.25 | Quantifier(165) | 40692.07   | 107516.55  | 0.991284 | 2.44959E-05 | quantifier |
| Fluorene                                                   | PAHs            | 31.9 | 1.74 | Quantifier(165) | 185048.557 | 1232454.62 | 0.977325 | 3.18421E-06 | quantifier |
| Carbazole                                                  | others          | 37.1 | 2.64 | Quantifier(167) | 330671.238 | 509329.12  | 0.994968 | 2.35223E-06 | quantifier |
| Dibenzofuran                                               | ethers          | 30.3 | 1.68 | Quantifier(168) | 279938.104 | 4594967.5  | 0.991009 | 2.08813E-06 | quantifier |
| Diphenyl ether                                             | ethers          | 27.4 | 1.5  | Quantifier(170) | 200982.002 | 404653.953 | 0.993451 | 4.34928E-06 | quantifier |
| Phenanthrene                                               | PAHs            | 36.1 | 2.16 | Quantifier(178) | 186447.071 | 5917632.92 | 0.996963 | 2.09913E-06 | quantifier |
| Anthracene                                                 | PAHs            | 36.3 | 2.13 | Quantifier(178) | 307956.618 | 3390378.24 | 0.954747 | 1.89444E-06 | quantifier |
| Benzene,<br>1-chloro-2-(trifluoromethyl)-                  | halocarbons     | 10.9 | 0.63 | Quantifier(180) | 52767.7899 | -288050.76 | 0.980687 | 3.37298E-05 | quantifier |
| Benzene, 1,2,4-trichloro-                                  | halocarbons     | 21.4 | 1.14 | Quantifier(180) | 85996.094  | 616790.412 | 0.982474 | 7.2993E-06  | quantifier |
| Dibutyl adipate                                            | esters          | 35.6 | 0.99 | Quantifier(185) | 59991.765  | 894675.35  | 0.981535 | 1.10492E-05 | quantifier |

|                                            |             |      |      |                 |            |            |          |             |            |
|--------------------------------------------|-------------|------|------|-----------------|------------|------------|----------|-------------|------------|
| Phenol, 2,4,6-trichloro-                   | phenols     | 26.3 | 1.32 | Quantifier(196) | 42228.88   | 137118.2   | 0.996066 | 2.26656E-05 | quantifier |
| Phenol, 2,4,5-trichloro-                   | phenols     | 26.7 | 1.29 | Quantifier(196) | 41491.7831 | -28905.413 | 0.997369 | 2.55656E-05 | quantifier |
| Fluoranthene                               | PAHs        | 41.5 | 2.46 | Quantifier(202) | 278226.797 | -134067.87 | 0.999049 | 2.26623E-06 | quantifier |
| Pyrene                                     | PAHs        | 42.4 | 2.7  | Quantifier(202) | 300945.846 | 1604594.34 | 0.984916 | 2.07521E-06 | quantifier |
| Benzene, 1-chloro-4-phenoxy-               | aromatics   | 32   | 1.56 | Quantifier(204) | 79511.208  | 560171.89  | 0.976335 | 7.20455E-06 | quantifier |
| Cyclotrisiloxane,<br>hexamethyl-(D3)       | siloxanes   | 10.3 | 6.21 | Quantifier(207) | 21169.1058 | -681506.5  | 0.953529 |             |            |
| 1,3-Butadiene,<br>1,1,2,3,4,4-hexachloro-  | halocarbons | 22.8 | 0.84 | Quantifier(225) | 21615.92   | 701041.8   | 0.997131 | 1.79058E-05 | quantifier |
| Benz[a]anthracene                          | PAHs        | 48.4 | 4.5  | Quantifier(228) | 213630.011 | 594086.284 | 0.987413 | 3.84991E-06 | quantifier |
| Chrysene                                   | PAHs        | 48.6 | 4.77 | Quantifier(228) | 297532.503 | 1064500.33 | 0.991383 | 2.28984E-06 | quantifier |
| Benzene, 1-bromo-4-phenoxy-                | halocarbons | 34.1 | 1.74 | Quantifier(248) | 33682.9865 | 722737.231 | 0.993747 | 1.46462E-05 | quantifier |
| Benzo[b]fluoranthene                       | PAHs        | 54.3 | 4.08 | Quantifier(252) | 568086.558 | 1558460.16 | 0.971726 | 1.46715E-06 | quantifier |
| Benzo[k]fluoranthene                       | PAHs        | 55.9 | 5.34 | Quantifier(252) | 207862.341 | 79057.7675 | 0.993479 | 4.56523E-06 | quantifier |
| Benzo[ghi]perylene                         | PAHs        | 62.9 | 4.53 | Quantifier(276) | 239833.004 | 749842.5   | 0.985134 | 4.11007E-06 | quantifier |
| Indeno[1,2,3-cd]pyrene                     | PAHs        | 64.8 | 6.6  | Quantifier(276) | 124920.805 | 11890.7    | 0.984077 | 8.7779E-06  | quantifier |
| Cyclotetrasiloxane,<br>octamethyl-(D4)     | siloxanes   | 16.5 | 6.21 | Quantifier(281) | 128593.469 | 1902775.86 | 0.967596 | 4.48484E-06 | quantifier |
| Benzene, hexachloro-                       | halocarbons | 34.8 | 1.41 | Quantifier(284) | 28244.7135 | 734622.769 | 0.986717 | 1.58519E-05 | quantifier |
| n-Propyl acetate                           | esters      | 6.9  | 0.6  | Quantifier(43)  | 62835.5046 | 712890.06  | 0.958948 | 8.26336E-06 | quantifier |
| sec-Butyl acetate                          | esters      | 7.9  | 6.57 | Quantifier(43)  | 56155.4618 | 232064.088 | 0.995145 | 1.27468E-05 | quantifier |
| 1-Butanol, 3-methyl-, acetate              | esters      | 11.7 | 0.66 | Quantifier(43)  | 174466.653 | -754964.51 | 0.987068 | 8.35382E-06 | quantifier |
| Acetic acid, hexyl ester                   | esters      | 16.3 | 0.69 | Quantifier(43)  | 137317.113 | 390939.782 | 0.995137 | 5.3658E-06  | quantifier |
| 2-Heptanone                                | ketones     | 12   | 0.78 | Quantifier(43)  | 235077.675 | -16249.99  | 0.999539 | 3.8733E-06  | quantifier |
| 5-Hepten-2-one, 6-methyl-                  | ketones     | 15.3 | 0.87 | Quantifier(43)  | 135602.853 | -91064.874 | 0.994135 | 7.84336E-06 | quantifier |
| Methyl thiolacetate                        | others      | 6.5  | 0.75 | Quantifier(43)  | 36839.1518 | 124770.425 | 0.997808 | 2.10015E-05 | quantifier |
| Propanoic acid, 2-hydroxy-,<br>ethyl ester | esters      | 9.6  | 0.78 | Quantifier(45)  | 229477.995 | -2133724.3 | 0.991894 | 1.08789E-05 | quantifier |

|                                   |           |      |      |                |            |            |          |             |            |
|-----------------------------------|-----------|------|------|----------------|------------|------------|----------|-------------|------------|
| Bis(2-chloro-1-methylethyl) ether | ethers    | 17.4 | 0.93 | Quantifier(45) | 249499.551 | 2091527.72 | 0.972361 | 2.43046E-06 | quantifier |
| S-Methyl methanethiosulphonate    | others    | 17   | 2.73 | Quantifier(47) | 55663.3    | -1299977   | 1        |             |            |
| 2-Propenenitrile, 2-chloro-       | nitriles  | 5.2  | 0.57 | Quantifier(52) | 39085.6513 | 62634.1402 | 0.998079 | 2.22115E-05 | quantifier |
| 1-Butanol, 3-methyl-              | alcohols  | 7.4  | 6.57 | Quantifier(55) | 110459.135 | -466671.3  | 0.996545 | 1.73678E-05 | quantifier |
| 1-Dodecanol                       | alcohols  | 29.5 | 0.69 | Quantifier(55) | 123824.649 | -924855.59 | 0.985058 | 3.75208E-05 | quantifier |
| Cyclohexanone                     | ketones   | 11.8 | 1.35 | Quantifier(55) | 191984.33  | -604929.55 | 0.994404 | 8.8754E-06  | quantifier |
| Caprolactam                       | others    | 22.9 | 2.52 | Quantifier(55) | 115640.482 | -1212316.5 | 0.999999 |             |            |
| 1-Butanol                         | alcohols  | 6    | 0.51 | Quantifier(56) | 96642.0912 | -31504.808 | 0.996538 | 1.12188E-05 | quantifier |
| 1-Hexanol                         | alcohols  | 11.5 | 0.69 | Quantifier(56) | 126154.929 | -1123407   | 0.98363  |             |            |
| Decanal                           | aldehydes | 22.2 | 0.72 | Quantifier(57) | 10032.0096 | 2353536.5  | 0.999969 | 1.00115E-05 | quantifier |
| Dodecanal                         | aldehydes | 27.7 | 0.72 | Quantifier(57) | 53663.0143 | 293039.342 | 0.975566 | 1.3212E-05  | quantifier |
| n-Butyl ether                     | ethers    | 12.2 | 0.48 | Quantifier(57) | 274589.281 | -1295799.9 | 0.994309 | 9.45026E-06 | quantifier |
| 3-Heptanone                       | ketones   | 11.9 | 0.75 | Quantifier(57) | 175663.864 | 156580.395 | 0.987488 | 5.04713E-06 | quantifier |
| C7                                | n-alkanes | 6.8  | 0.3  | Quantifier(57) | 7320.28    | 432670.95  | 0.95042  | 3.86884E-05 | quantifier |
| C8                                | n-alkanes | 9.5  | 6.36 | Quantifier(57) | 8475.435   | 333423.15  | 0.978284 | 4.0298E-05  | quantifier |
| C9                                | n-alkanes | 12.9 | 6.36 | Quantifier(57) | 120235.624 | -99427.234 | 0.9647   | 1.61956E-05 | quantifier |
| C10                               | n-alkanes | 16.3 | 6.39 | Quantifier(57) | 83877.9904 | 4201287.31 | 0.997749 | 3.42886E-06 | quantifier |
| C11                               | n-alkanes | 19.6 | 0.39 | Quantifier(57) | 58379.5981 | 4919162.77 | 0.991546 | 3.38982E-06 | quantifier |
| C12                               | n-alkanes | 22.6 | 0.39 | Quantifier(57) | 81584.735  | 4801650.65 | 0.991965 | 3.13495E-06 | quantifier |
| C13                               | n-alkanes | 25.3 | 0.42 | Quantifier(57) | 97441.9846 | 5681795.69 | 0.996596 | 2.59862E-06 | quantifier |
| C14                               | n-alkanes | 27.9 | 0.42 | Quantifier(57) | 61722.64   | 7616313.35 | 0.98976  | 2.29698E-06 | quantifier |
| C15                               | n-alkanes | 30.4 | 0.45 | Quantifier(57) | 59203.39   | 6216782.1  | 0.966441 | 2.84017E-06 | quantifier |
| C16                               | n-alkanes | 32.6 | 6.45 | Quantifier(57) | 46754.24   | 5451474.35 | 0.978873 | 3.1732E-06  | quantifier |
| C17                               | n-alkanes | 34.8 | 6.45 | Quantifier(57) | 83770.76   | 7352452.9  | 0.96089  | 2.35652E-06 | quantifier |
| C18                               | n-alkanes | 36.9 | 0.48 | Quantifier(57) | 48317      | 5389776    | 0.994807 | 3.12675E-06 | quantifier |
| C19                               | n-alkanes | 38.8 | 6.51 | Quantifier(57) | 64620.305  | 5266453.45 | 0.988654 | 3.1737E-06  | quantifier |
| C20                               | n-alkanes | 40.8 | 0.51 | Quantifier(57) | 119998.177 | 5134521.54 | 0.99989  | 2.6596E-06  | quantifier |



|                                               |           |      |      |                |            |            |          |             |            |
|-----------------------------------------------|-----------|------|------|----------------|------------|------------|----------|-------------|------------|
| C21                                           | n-alkanes | 42.5 | 0.54 | Quantifier(57) | 130128.327 | 4467730.54 | 0.997373 | 2.85993E-06 | quantifier |
| C22                                           | n-alkanes | 44.2 | 0.54 | Quantifier(57) | 139113.687 | 4675122.23 | 0.989379 | 2.74312E-06 | quantifier |
| C23                                           | n-alkanes | 45.9 | 0.63 | Quantifier(57) | 87427.67   | 6186200.05 | 0.97346  | 2.66406E-06 | quantifier |
| C24                                           | n-alkanes | 47.8 | 0.78 | Quantifier(57) | 159896.493 | 6077824    | 0.99682  | 2.10874E-06 | quantifier |
| C25                                           | n-alkanes | 50   | 0.99 | Quantifier(57) | 180486.007 | 5367065    | 0.993152 | 2.14525E-06 | quantifier |
| C26                                           | n-alkanes | 52.1 | 0.69 | Quantifier(57) | 102498.456 | 8012553.69 | 0.995087 | 2.03811E-06 | quantifier |
| C27                                           | n-alkanes | 53.7 | 0.69 | Quantifier(57) | 129061.414 | 4907054    | 0.997719 | 2.62096E-06 | quantifier |
| C28                                           | n-alkanes | 55.4 | 0.81 | Quantifier(57) | 207877.739 | 3395350.5  | 0.999502 | 2.68609E-06 | quantifier |
| C29                                           | n-alkanes | 57.2 | 0.99 | Quantifier(57) | 184951.404 | 2317084.5  | 0.999612 | 3.37157E-06 | quantifier |
| C30                                           | n-alkanes | 59.4 | 1.23 | Quantifier(57) | 179109.234 | 209777.88  | 0.982392 | 4.12872E-06 | quantifier |
| C31                                           | n-alkanes | 62   | 1.5  | Quantifier(57) | 153485.431 | 23965.0565 | 0.988572 | 5.23866E-06 | quantifier |
| C32                                           | n-alkanes | 65.1 | 1.83 | Quantifier(57) | 104885.436 | 1953288    | 0.973182 | 5.48111E-06 | quantifier |
| Terpineol                                     | alcohols  | 21.9 | 0.93 | Quantifier(59) | 110318.538 | 343731.031 | 0.977379 | 8.07002E-06 | quantifier |
| Propanoic acid, 2-chloro-, methyl ester       | esters    | 8.7  | 0.9  | Quantifier(63) | 61333.2811 | -168558.26 | 0.994755 | 1.98275E-05 | quantifier |
| o-Nitroaniline                                | others    | 27.2 | 2.37 | Quantifier(65) | 57086.215  | -15018.15  | 0.991773 | 2.06838E-05 | quantifier |
| m-Nitroaniline                                | others    | 29.2 | 2.55 | Quantifier(65) | 54811.12   | -3796.95   | 0.991837 | 2.12108E-05 | quantifier |
| p-Nitroaniline                                | others    | 32   | 3    | Quantifier(65) | 38502.19   | 240522.1   | 0.985155 | 2.38923E-05 | quantifier |
| Citronellol                                   | alcohols  | 22.9 | 0.78 | Quantifier(69) | 78849.9241 | -233192.06 | 0.991207 | 2.0028E-05  | quantifier |
| Citral                                        | aldehydes | 23.9 | 0.99 | Quantifier(69) | 93061.2394 | -430026.17 | 0.996819 | 1.96637E-05 | quantifier |
| Linalool                                      | alcohols  | 19.2 | 0.69 | Quantifier(71) | 13409.5976 | -29238.05  | 0.997827 |             |            |
| Butanoic acid, ethyl ester                    | esters    | 9.2  | 0.66 | Quantifier(71) | 32356.781  | 225214.346 | 0.995375 | 1.74158E-05 | quantifier |
| 2,2,4-Trimethyl-1,3-pentanediol diisobutyrate | esters    | 26.9 | 0.81 | Quantifier(71) | 114293.663 | -75685.576 | 0.992158 | 1.16457E-05 | quantifier |
| Formamide, N,N-dimethyl-                      | amides    | 8.3  | 1.62 | Quantifier(73) | 136372.576 | -1639405.1 | 0.991024 | 6.46743E-05 | quantifier |
| Cyclopentasiloxane, decamethyl-(D5)           | siloxanes | 21.5 | 6.24 | Quantifier(73) | 45705.4052 | 3844226.02 | 0.971154 | 4.45964E-06 | quantifier |
| Cyclohexasiloxane,                            | siloxanes | 26.4 | 6.21 | Quantifier(73) | 27461.9983 | 2314406.33 | 0.92923  | 8.05801E-06 | quantifier |

|                                   |                 |      |      |                |            |            |          |             |            |
|-----------------------------------|-----------------|------|------|----------------|------------|------------|----------|-------------|------------|
| dodecamethyl-(D6)                 |                 |      |      |                |            |            |          |             |            |
| N-Nitrosodimethylamine            | amines          | 7.2  | 1.44 | Quantifier(74) | 79301.675  | 45695      | 0.999632 | 1.18737E-05 | quantifier |
| Benzaldehyde                      | aldehydes       | 14.2 | 1.47 | Quantifier(77) | 67111.0585 | 2527729.95 | 0.954625 | 6.08124E-06 | quantifier |
| Acetic acid, chloro-, ethyl ester | esters          | 10.1 | 1.08 | Quantifier(77) | 58363.8652 | -273677.7  | 0.995285 | 2.99013E-05 | quantifier |
| Benzene, nitro-                   | nitro-aromatics | 18.2 | 1.65 | Quantifier(77) | 110574.044 | 88468.8707 | 0.988179 | 8.49194E-06 | quantifier |
| Azobenzene                        | others          | 32.7 | 1.68 | Quantifier(77) | 190853.681 | 1215199.02 | 0.981028 | 3.14077E-06 | quantifier |
| Benzyl alcohol                    | alcohols        | 17   | 1.38 | Quantifier(79) | 77124.835  | 943492.15  | 0.999689 | 8.13814E-06 | quantifier |
| Isophorone                        | ketones         | 19.4 | 1.2  | Quantifier(82) | 144711.039 | 5467039.79 | 0.998747 |             |            |
| Cyclohexane-C6                    | cycloalkanes    | 23.7 | 0.51 | Quantifier(83) | 93485.9397 | 4432996.97 | 0.998368 | 3.20437E-06 | quantifier |
| Cyclohexane-C7                    | cycloalkanes    | 26.5 | 0.51 | Quantifier(83) | 77441.18   | 4282127.45 | 0.964403 | 3.53225E-06 | quantifier |
| Cyclohexane-C8                    | cycloalkanes    | 29   | 6.54 | Quantifier(83) | 72784.8441 | 4100978.14 | 0.974758 | 3.84769E-06 | quantifier |
| Phenylethyl Alcohol               | alcohols        | 19.4 | 1.41 | Quantifier(91) | 290662.176 | -2968011.1 | 0.99427  | 1.33354E-05 | quantifier |
| Toluene                           | aromatics       | 8.3  | 0.72 | Quantifier(91) | 40729.9019 | 1363235.23 | 0.990375 | 9.80998E-06 | quantifier |
| Ethylbenzene                      | aromatics       | 11.3 | 0.75 | Quantifier(91) | 77930.6472 | 570790.215 | 0.993751 | 8.01141E-06 | quantifier |
| Benzene, 1,3-dimethyl-            | aromatics       | 11.6 | 0.72 | Quantifier(91) | 272561.801 | -610546.59 | 0.990536 | 6.13796E-06 | quantifier |
| o-Xylene                          | aromatics       | 12.3 | 0.84 | Quantifier(91) | 155669.358 | -1368693.1 | 0.973105 | 1.68025E-05 | quantifier |
| Benzene, propyl-                  | aromatics       | 14.4 | 0.78 | Quantifier(91) | 277925.567 | 1056466.94 | 0.985482 | 3.43647E-06 | quantifier |
| Benzeneacetic acid, ethyl ester   | esters          | 23   | 1.29 | Quantifier(91) | 422328.049 | -462584.64 | 0.99985  | 2.6904E-06  | quantifier |
| Alpha-Pinene                      | alkenes         | 14   | 0.54 | Quantifier(93) | 7737.3504  | 60278.6087 | 0.97996  | 8.24436E-05 | quantifier |
| 3-Carene                          | alkenes         | 16.6 | 0.6  | Quantifier(93) | 127653.279 | -328175.98 | 0.986408 | 1.49216E-05 | quantifier |
| Linalyl acetate                   | esters          | 23.6 | 6.69 | Quantifier(93) | 55618.15   | -1844572   | 1        |             |            |
| Bis(2-chloroethyl) ether          | ethers          | 14.9 | 1.26 | Quantifier(93) | 124070.962 | 177735.477 | 0.987959 | 6.91045E-06 | quantifier |
| Methane, bis(2-chloroethoxy)-     | ethers          | 20.5 | 1.29 | Quantifier(93) | 112202.2   | 2775329.25 | 0.958071 | 4.62496E-06 | quantifier |
| Phenol                            | phenols         | 15.4 | 1.17 | Quantifier(94) | 75004.6846 | -828090.85 | 0.997412 | 3.70606E-05 | quantifier |
| Camphor                           | ketones         | 20.3 | 1.14 | Quantifier(95) | 103524.07  | -83537.949 | 0.995205 | 1.06481E-05 | quantifier |
| 1-Butanol                         | alcohols        | 6    | 0.51 | Volume(-)      | 371770.169 | 17028801   | 0.964114 | 4.4218E-07  | volume     |
| 1-Butanol, 3-methyl-              | alcohols        | 7.4  | 6.57 | Volume(-)      | 768703.535 | 4686315.7  | 0.988049 | 8.6499E-07  | volume     |
| 1-Hexanol                         | alcohols        | 11.5 | 0.69 | Volume(-)      | 461868.264 | -1777981   | 0.984581 |             |            |

|                              |              |      |      |           |            |            |          |             |        |
|------------------------------|--------------|------|------|-----------|------------|------------|----------|-------------|--------|
| Benzyl alcohol               | alcohols     | 17   | 1.38 | Volume(-) | 313467.05  | 24115041.3 | 0.996083 | 6.43458E-07 | volume |
| Linalool                     | alcohols     | 19.2 | 0.69 | Volume(-) | 106489.439 | 5653581.44 | 0.977716 |             |        |
| Phenylethyl Alcohol          | alcohols     | 19.4 | 1.41 | Volume(-) | 951424.093 | 3536114.26 | 0.997184 | 8.08847E-07 | volume |
| Terpineol                    | alcohols     | 21.9 | 0.93 | Volume(-) | 874457.355 | 8776301.27 | 0.987818 | 5.95631E-07 | volume |
| Citronellol                  | alcohols     | 22.9 | 0.78 | Volume(-) | 736130.411 | 3235752.75 | 0.99251  | 7.37487E-07 | volume |
| 1-Dodecanol                  | alcohols     | 29.5 | 0.69 | Volume(-) | 1675362.33 | -11839246  | 0.993296 | 1.27205E-06 | volume |
| Benzaldehyde                 | aldehydes    | 14.2 | 1.47 | Volume(-) | 295989.292 | 32923561.1 | 0.928861 | 5.62022E-07 | volume |
| Decanal                      | aldehydes    | 22.2 | 0.72 | Volume(-) | 90832.1943 | 30410602.5 | 0.91838  | 7.68249E-07 | volume |
| Citral                       | aldehydes    | 23.9 | 0.99 | Volume(-) | 476599.703 | 5532991.75 | 0.997937 | 1.03847E-06 | volume |
| Dodecanal                    | aldehydes    | 27.7 | 0.72 | Volume(-) | 613460.835 | 8672551.69 | 0.973318 | 7.06712E-07 | volume |
| 3-Carene                     | alkenes      | 16.6 | 0.6  | Volume(-) | 555477.598 | 2352661.96 | 0.996717 | 1.31338E-06 | volume |
| Formamide, N,N-dimethyl-     | amides       | 8.3  | 1.62 | Volume(-) | 639538.124 | -1756059.9 | 0.999197 | 1.89851E-06 | volume |
| N-Nitrosodimethylamine       | amines       | 7.2  | 1.44 | Volume(-) | 125347.589 | 17277719.5 | 0.915964 | 9.67984E-07 | volume |
| Toluene                      | aromatics    | 8.3  | 0.72 | Volume(-) | 111437.345 | 15552626.6 | 0.908394 | 1.13912E-06 | volume |
| Ethylbenzene                 | aromatics    | 11.3 | 0.75 | Volume(-) | 164716.114 | 7648261.32 | 0.993769 | 1.74172E-06 | volume |
| Benzene, 1,3-dimethyl-       | aromatics    | 11.6 | 0.72 | Volume(-) | 732906.039 | 7395867.46 | 0.999845 | 1.95158E-06 | volume |
| Styrene                      | aromatics    | 12.2 | 0.93 | Volume(-) | 382946.99  | 2598518.1  | 0.967069 | 2.51416E-06 | volume |
| o-Xylene                     | aromatics    | 12.3 | 0.84 | Volume(-) | 422382.202 | -1314510.3 | 0.963411 | 2.7499E-06  | volume |
| Benzene, (1-methylethyl)-    | aromatics    | 13.4 | 0.78 | Volume(-) | 548984.5   | 8129641.52 | 0.996125 | 1.13721E-06 | volume |
| Benzene, propyl-             | aromatics    | 14.4 | 0.78 | Volume(-) | 609446.518 | 12668627.1 | 0.999525 | 7.84626E-07 | volume |
| Biphenyl                     | aromatics    | 26.9 | 1.47 | Volume(-) | 833827.577 | 12937676.3 | 0.981003 | 5.22721E-07 | volume |
| Benzene, 1-chloro-4-phenoxy- | aromatics    | 32   | 1.56 | Volume(-) | 340005.725 | 15045138   | 0.99267  | 9.29891E-07 | volume |
| Cyclohexane-C6               | cycloalkanes | 23.7 | 0.51 | Volume(-) | 516190.948 | 24464884.6 | 0.995987 | 5.60808E-07 | volume |
| Cyclohexane-C7               | cycloalkanes | 26.5 | 0.51 | Volume(-) | 197535.205 | 27873753.2 | 0.952813 | 6.72421E-07 | volume |
| Cyclohexane-C8               | cycloalkanes | 29   | 6.54 | Volume(-) | 358018.607 | 25520410.2 | 0.9402   | 6.82893E-07 | volume |
| n-Propyl acetate             | esters       | 6.9  | 0.6  | Volume(-) | 172406.138 | 6510745.63 | 0.978575 | 1.13561E-06 | volume |
| sec-Butyl acetate            | esters       | 7.9  | 6.57 | Volume(-) | 365821.06  | 4516487.8  | 0.998136 | 1.15229E-06 | volume |
| Propanoic acid, 2-chloro-,   | esters       | 8.7  | 0.9  | Volume(-) | 206144.927 | 8670199.74 | 0.97375  | 9.95367E-07 | volume |

|                                                         |        |      |      |           |            |            |          |             |        |  |
|---------------------------------------------------------|--------|------|------|-----------|------------|------------|----------|-------------|--------|--|
| methyl ester                                            |        |      |      |           |            |            |          |             |        |  |
| Butanoic acid, ethyl ester                              | esters | 9.2  | 0.66 | Volume(-) | 138521.093 | 10530426.9 | 0.97704  | 8.0804E-07  | volume |  |
| Propanoic acid, 2-hydroxy-, ethyl ester                 | esters | 9.6  | 0.78 | Volume(-) | 237641.369 | 9228945.01 | 0.977146 | 8.03557E-07 | volume |  |
| Acetic acid, chloro-, ethyl ester                       |        |      |      |           |            |            |          |             |        |  |
| Acetic acid, chloro-, ethyl ester                       | esters | 10.1 | 1.08 | Volume(-) | 636784.626 | 3482306.52 | 0.99672  | 9.18225E-07 | volume |  |
| Acetic acid, hexyl ester                                | esters | 16.3 | 0.69 | Volume(-) | 584635.045 | 3691577.98 | 0.999881 | 1.01926E-06 | volume |  |
| Acetic acid, phenylmethyl ester                         | esters | 20.7 | 1.32 | Volume(-) | 1047153.31 | -2856342.3 | 0.998769 | 1.12506E-06 | volume |  |
| Benzeneacetic acid, ethyl ester                         | esters | 23   | 1.29 | Volume(-) | 776055.212 | 4430225.49 | 0.984715 | 8.93401E-07 | volume |  |
| Acetic acid, 2-phenylethyl ester                        | esters | 23.4 | 1.29 | Volume(-) | 660762.445 | 9186511.08 | 0.995017 | 6.24023E-07 | volume |  |
| Linalyl acetate                                         | esters | 23.6 | 6.69 | Volume(-) | 575136.95  | -6733826   | 1        |             |        |  |
| Benzeneethanol, dimethyl-, acetate                      | esters | 25.3 | 1.02 | Volume(-) | 918069.484 | 3341459.89 | 0.97681  | 1.1607E-06  | volume |  |
| 2,2,4-Trimethyl-1,3-pentanediol diisobutyrate           |        |      |      |           |            |            |          |             |        |  |
| 2,2,4-Trimethyl-1,3-pentanediol diisobutyrate           | esters | 26.9 | 0.81 | Volume(-) | 414581.406 | 13288013.6 | 0.93362  | 1.20476E-06 | volume |  |
| Dimethyl phthalate                                      | esters | 28.4 | 1.86 | Volume(-) | 382161.965 | 4090570.92 | 0.970216 | 1.5413E-06  | volume |  |
| Diethyl Phthalate                                       | esters | 31.7 | 1.65 | Volume(-) | 347421.027 | 2214076.87 | 0.994984 | 1.87418E-06 | volume |  |
| Dibutyl adipate                                         | esters | 35.6 | 0.99 | Volume(-) | 654608.34  | 28310250.9 | 0.970301 | 5.38476E-07 | volume |  |
| Benzyl Benzoate                                         | esters | 35.6 | 1.89 | Volume(-) | 1198995.63 | 13776826.8 | 0.994584 | 4.19534E-07 | volume |  |
| 1,2-Benzenedicarboxylic acid, bis(2-methylpropyl) ester | esters | 37.5 | 1.38 | Volume(-) | 720445.973 | 26780920.3 | 0.99221  | 4.84178E-07 | volume |  |
| Dibutyl phthalate                                       | esters | 39.3 | 1.47 | Volume(-) | 490263.071 | 26288201   | 0.915778 | 6.12372E-07 | volume |  |
| Benzyl butyl phthalate                                  | esters | 45.9 | 2.58 | Volume(-) | 599420.415 | 29148243.9 | 0.952222 | 5.53382E-07 | volume |  |
| Hexanedioic acid, bis(2-ethylhexyl) ester               | esters | 47.2 | 1.2  | Volume(-) | 1403558.03 | -1591044   | 0.989732 | 5.29825E-07 | volume |  |
| Bis(2-ethylhexyl) phthalate                             | esters | 50.2 | 2.22 | Volume(-) | 990602.44  | 35974273.4 | 0.98858  | 3.66661E-07 | volume |  |
| Di-N-octyl phthalate                                    | esters | 53.6 | 1.56 | Volume(-) | 970681.25  | 49149986.3 | 0.994088 | 2.8276E-07  | volume |  |
| n-Butyl ether                                           | ethers | 12.2 | 0.48 | Volume(-) | 543706.17  | 522042.965 | 0.989505 | 1.70108E-06 | volume |  |
| Bis(2-chloroethyl) ether                                | ethers | 14.9 | 1.26 | Volume(-) | 293251.721 | 10112408.2 | 0.981181 | 1.18076E-06 | volume |  |

|                                             |             |      |      |           |            |            |          |             |        |
|---------------------------------------------|-------------|------|------|-----------|------------|------------|----------|-------------|--------|
| Bis(2-chloro-1-methylethyl) ether           | ethers      | 17.4 | 0.93 | Volume(-) | 502820.195 | 20511710.8 | 0.982945 | 6.41801E-07 | volume |
| Methane, bis(2-chloroethoxy)-Diphenyl ether | ethers      | 20.5 | 1.29 | Volume(-) | 789231.604 | 29903803.5 | 0.996062 | 4.49011E-07 | volume |
| Diphenyl ether                              | ethers      | 27.4 | 1.5  | Volume(-) | 1502301.27 | 1056835.95 | 0.994182 | 5.60487E-07 | volume |
| Dibenzofuran                                | ethers      | 30.3 | 1.68 | Volume(-) | 456697.98  | 27947696.2 | 0.946373 | 5.86123E-07 | volume |
| Benzene, 1-chloro-2-(trifluoromethyl)-      | halocarbons | 10.9 | 0.63 | Volume(-) | 408718.749 | 5998995.16 | 0.986613 | 9.48426E-07 | volume |
| Benzene, 1,3-dichloro-                      | halocarbons | 15.9 | 1.05 | Volume(-) | 253717.267 | 5558043.85 | 0.999359 | 1.89426E-06 | volume |
| Benzene, 1,4-dichloro-                      | halocarbons | 16.1 | 1.08 | Volume(-) | 477669.97  | 2813017.91 | 0.994554 | 8.93244E-07 | volume |
| Benzene, 1,2-dichloro-                      | halocarbons | 16.9 | 1.14 | Volume(-) | 417706.139 | 10280963.4 | 0.981112 | 8.99799E-07 | volume |
| Ethane, hexachloro-                         | halocarbons | 18.4 | 0.93 | Volume(-) | 178919.348 | 10358046.7 | 0.983889 | 1.59793E-06 | volume |
| Benzene, 1,2,4-trichloro-                   | halocarbons | 21.4 | 1.14 | Volume(-) | 986872.498 | 2585774.85 | 0.997446 | 1.0402E-06  | volume |
| 1,3-Butadiene, 1,1,2,3,4,4-hexachloro-      | halocarbons | 22.8 | 0.84 | Volume(-) | 159192.86  | 16639933.2 | 0.994979 | 1.0209E-06  | volume |
| Naphthalene, 2-chloro-                      | halocarbons | 26.8 | 1.53 | Volume(-) | 427755.267 | 32539597.8 | 0.993208 | 4.91567E-07 | volume |
| Benzene, 1-bromo-4-phenoxy-                 | halocarbons | 34.1 | 1.74 | Volume(-) | 509885.978 | 10320899.6 | 0.977821 | 9.76793E-07 | volume |
| Benzene, hexachloro-                        | halocarbons | 34.8 | 1.41 | Volume(-) | 145535.96  | 16932293.4 | 0.973847 | 1.05536E-06 | volume |
| Indole                                      | indoles     | 24.4 | 2.1  | Volume(-) | 1160645.73 | 13181754.1 | 0.993281 | 3.65726E-07 | volume |
| Cyclohexanone                               | ketones     | 11.8 | 1.35 | Volume(-) | 768571.842 | 13246450.7 | 0.977102 | 5.0048E-07  | volume |
| 3-Heptanone                                 | ketones     | 11.9 | 0.75 | Volume(-) | 337670.212 | 10556939.7 | 0.997361 | 1.12921E-06 | volume |
| 5-Hepten-2-one, 6-methyl-                   | ketones     | 15.3 | 0.87 | Volume(-) | 715277.453 | 6622011.06 | 0.996124 | 7.36244E-07 | volume |
| Acetophenone                                | ketones     | 17.7 | 1.5  | Volume(-) | 803630.829 | 15811130.1 | 0.987278 | 3.73598E-07 | volume |
| Isophorone                                  | ketones     | 19.4 | 1.2  | Volume(-) | 232077.139 | 19913900.5 | 0.99291  |             |        |
| Camphor                                     | ketones     | 20.3 | 1.14 | Volume(-) | 754493.313 | 4795306.75 | 0.984681 | 7.43488E-07 | volume |
| C7                                          | n-alkanes   | 6.8  | 0.3  | Volume(-) | 127233.285 | 17592558.7 | 0.936707 | 9.04836E-07 | volume |
| C8                                          | n-alkanes   | 9.5  | 6.36 | Volume(-) | 211176.589 | 24792624.8 | 0.936172 | 7.04735E-07 | volume |
| C9                                          | n-alkanes   | 12.9 | 6.36 | Volume(-) | 494690.974 | 6730391.63 | 0.999576 | 1.98022E-06 | volume |
| C10                                         | n-alkanes   | 16.3 | 6.39 | Volume(-) | 310360.825 | 28307147   | 0.995473 | 5.83555E-07 | volume |

|                                |                 |      |      |           |            |            |          |             |        |
|--------------------------------|-----------------|------|------|-----------|------------|------------|----------|-------------|--------|
| C11                            | n-alkanes       | 19.6 | 0.39 | Volume(-) | 217524.065 | 30446956.6 | 0.997817 | 5.72834E-07 | volume |
| C12                            | n-alkanes       | 22.6 | 0.39 | Volume(-) | 371224.26  | 24216171.2 | 0.996241 | 6.49594E-07 | volume |
| C13                            | n-alkanes       | 25.3 | 0.42 | Volume(-) | 380560.135 | 38157001.7 | 0.986857 | 4.32196E-07 | volume |
| C14                            | n-alkanes       | 27.9 | 0.42 | Volume(-) | 126513.725 | 52109622.5 | 0.831378 | 3.75098E-07 | volume |
| C15                            | n-alkanes       | 30.4 | 0.45 | Volume(-) | 314167.78  | 45032615.7 | 0.95676  | 3.96835E-07 | volume |
| C16                            | n-alkanes       | 32.6 | 6.45 | Volume(-) | 499091.898 | 16637226.6 | 0.998321 | 5.15652E-07 | volume |
| C17                            | n-alkanes       | 34.8 | 6.45 | Volume(-) | 429261.04  | 47836313.6 | 0.964208 | 3.71499E-07 | volume |
| C18                            | n-alkanes       | 36.9 | 0.48 | Volume(-) | 1071200.05 | 25711698.7 | 0.905911 | 3.6825E-07  | volume |
| C19                            | n-alkanes       | 38.8 | 6.51 | Volume(-) | 542664.277 | 25649099.4 | 0.939338 | 4.44948E-07 | volume |
| C20                            | n-alkanes       | 40.8 | 0.51 | Volume(-) | 798637.067 | 42583916.1 | 0.98845  | 3.59932E-07 | volume |
| C21                            | n-alkanes       | 42.5 | 0.54 | Volume(-) | 625403.925 | 52123220   | 0.996117 | 3.13097E-07 | volume |
| C22                            | n-alkanes       | 44.2 | 0.54 | Volume(-) | 738515.729 | 49371822.1 | 0.986974 | 3.16644E-07 | volume |
| C23                            | n-alkanes       | 45.9 | 0.63 | Volume(-) | 468679.568 | 68021690.5 | 0.822762 | 2.76351E-07 | volume |
| C24                            | n-alkanes       | 47.8 | 0.78 | Volume(-) | 1642492.32 | 34264579.6 | 0.987253 | 2.08419E-07 | volume |
| C25                            | n-alkanes       | 50   | 0.99 | Volume(-) | 1006802.22 | 52180805.5 | 0.979821 | 2.64363E-07 | volume |
| C26                            | n-alkanes       | 52.1 | 0.69 | Volume(-) | 1071560.9  | 73193410   | 0.98666  | 2.05124E-07 | volume |
| C27                            | n-alkanes       | 53.7 | 0.69 | Volume(-) | 297997.175 | 79536129   | 0.924074 | 2.40992E-07 | volume |
| C28                            | n-alkanes       | 55.4 | 0.81 | Volume(-) | 1248237.68 | 71716056   | 0.984305 | 2.1496E-07  | volume |
| C29                            | n-alkanes       | 57.2 | 0.99 | Volume(-) | 1511457.41 | 45597776.5 | 0.995881 | 2.71805E-07 | volume |
| C30                            | n-alkanes       | 59.4 | 1.23 | Volume(-) | 985551.162 | 47138362.2 | 0.927356 | 3.14148E-07 | volume |
| C31                            | n-alkanes       | 62   | 1.5  | Volume(-) | 1153965.03 | 39361148.5 | 0.89353  | 3.75649E-07 | volume |
| C32                            | n-alkanes       | 65.1 | 1.83 | Volume(-) | 2862892.86 | 889904.262 | 0.933398 | 2.70115E-07 | volume |
| Benzonitrile                   | nitriles        | 14.8 | 1.62 | Volume(-) | 669404.017 | 5322867.01 | 0.982467 | 6.72332E-07 | volume |
| Benzene, nitro-                | nitro-aromatics | 18.2 | 1.65 | Volume(-) | 410963.785 | 11364083.8 | 0.968992 | 2.14487E-06 | volume |
| Benzene, 2-methyl-1,3-dinitro- | nitro-aromatics | 28.1 | 2.25 | Volume(-) | 302991.52  | 15797394.3 | 0.983646 | 9.25809E-07 | volume |
| Methyl thiolacetate            | others          | 6.5  | 0.75 | Volume(-) | 119179.768 | 3575346.35 | 0.992657 | 2.06874E-06 | volume |
| S-Methyl methanethiosulphonate | others          | 17   | 2.73 | Volume(-) | 572472.9   | 4641170    | 1        |             |        |
| p-Chloroaniline                | others          | 21.9 | 1.8  | Volume(-) | 617262.11  | 15491041.7 | 0.96358  | 8.55657E-07 | volume |

|                        |         |      |      |           |            |            |          |             |        |
|------------------------|---------|------|------|-----------|------------|------------|----------|-------------|--------|
| Caprolactam            | others  | 22.9 | 2.52 | Volume(-) | 1053287.34 | 11054585   | 0.998908 |             |        |
| Quinoline              | others  | 23   | 1.8  | Volume(-) | 978932.614 | 13926338.9 | 0.99825  | 3.95047E-07 | volume |
| o-Nitroaniline         | others  | 27.2 | 2.37 | Volume(-) | 323997.815 | 12291086.1 | 0.97491  | 1.18862E-06 | volume |
| m-Nitroaniline         | others  | 29.2 | 2.55 | Volume(-) | 396400.993 | 12145274   | 0.947652 | 1.11597E-06 | volume |
| p-Nitroaniline         | others  | 32   | 3    | Volume(-) | 402928.829 | 16312345   | 0.987711 | 8.57156E-07 | volume |
| Azobenzene             | others  | 32.7 | 1.68 | Volume(-) | 457013.25  | 27266753.5 | 0.964036 | 5.99565E-07 | volume |
| Carbazole              | others  | 37.1 | 2.64 | Volume(-) | 736675.895 | 38880331.3 | 0.979556 | 3.88567E-07 | volume |
| Naphthalene            | PAHs    | 21.6 | 1.44 | Volume(-) | 578826.2   | 26016002.5 | 0.980146 | 5.57522E-07 | volume |
| Naphthalene, 2-methyl- | PAHs    | 24.8 | 1.35 | Volume(-) | 876151.23  | 56066828.7 | 0.975523 | 2.9039E-07  | volume |
| Acenaphthylene         | PAHs    | 28.6 | 1.83 | Volume(-) | 560799.725 | 25808574   | 0.955881 | 6.11109E-07 | volume |
| Acenaphthene           | PAHs    | 29.5 | 1.74 | Volume(-) | 369008.255 | 31445652.2 | 0.926645 | 5.70039E-07 | volume |
| Fluorene               | PAHs    | 31.9 | 1.74 | Volume(-) | 770538.355 | 25457595.5 | 0.986952 | 5.24415E-07 | volume |
| Phenanthrene           | PAHs    | 36.1 | 2.16 | Volume(-) | 509837.45  | 23180085.3 | 0.98984  | 6.27002E-07 | volume |
| Anthracene             | PAHs    | 36.3 | 2.13 | Volume(-) | 541299.735 | 41284837.2 | 0.982082 | 4.04086E-07 | volume |
| Fluoranthene           | PAHs    | 41.5 | 2.46 | Volume(-) | 608302.25  | 40499272.8 | 0.952228 | 4.20267E-07 | volume |
| Pyrene                 | PAHs    | 42.4 | 2.7  | Volume(-) | 709976.78  | 46290854.7 | 0.973638 | 3.55256E-07 | volume |
| Benz[a]anthracene      | PAHs    | 48.4 | 4.5  | Volume(-) | 563148.46  | 21107461.4 | 0.987229 | 6.6125E-07  | volume |
| Chrysene               | PAHs    | 48.6 | 4.77 | Volume(-) | 843500.82  | 49198941.6 | 0.977413 | 3.23077E-07 | volume |
| Benzo[b]fluoranthene   | PAHs    | 54.3 | 4.08 | Volume(-) | 1939792.71 | 36919246.5 | 0.958022 | 2.5317E-07  | volume |
| Benzo[k]fluoranthene   | PAHs    | 55.9 | 5.34 | Volume(-) | 664575.175 | 26418826.3 | 0.98293  | 5.4029E-07  | volume |
| Benzo[ghi]perylene     | PAHs    | 62.9 | 4.53 | Volume(-) | 1489621.91 | 58637845.5 | 0.948007 | 2.48837E-07 | volume |
| Indeno[1,2,3-cd]pyrene | PAHs    | 64.8 | 6.6  | Volume(-) | 412808.996 | 33364647.9 | 0.964393 | 7.83547E-07 | volume |
| Phenol                 | phenols | 15.3 | 1.17 | Volume(-) | 699127.973 | 19878129.3 | 0.993664 | 5.62012E-07 | volume |
| Phenol, 2-chloro-      | phenols | 15.6 | 1.14 | Volume(-) | 426779.07  | 2677929.55 | 0.984874 | 1.85234E-06 | volume |
| Phenol, 3-methyl-      | phenols | 18.3 | 1.2  | Volume(-) | 1482562.79 | 22941359.6 | 0.996644 | 3.73146E-07 | volume |
| Phenol, 2,6-dimethyl-  | phenols | 19.1 | 1.26 | Volume(-) | 559906.312 | 42982305.7 | 0.965926 | 3.87076E-07 | volume |
| Phenol, 2-nitro-       | phenols | 19.8 | 1.44 | Volume(-) | 284768.398 | 4284557.77 | 0.99974  | 2.03651E-06 | volume |
| Phenol, 2-methyl-      | phenols | 19.8 | 0.96 | Volume(-) | 1588271.67 | -20574066  | 0.999699 | 1.69098E-06 | volume |

|                                         |           |      |      |           |            |            |          |             |        |
|-----------------------------------------|-----------|------|------|-----------|------------|------------|----------|-------------|--------|
| Phenol, 2,4-dichloro-                   | phenols   | 21.3 | 1.2  | Volume(-) | 924474.084 | 2798422.37 | 0.993005 | 8.22116E-07 | volume |
| Phenol, 4-chloro-                       | phenols   | 22.2 | 1.32 | Volume(-) | 870925.718 | 17430419.3 | 0.985047 | 6.02054E-07 | volume |
| Phenol, 2,4,6-trichloro-                | phenols   | 26.3 | 1.32 | Volume(-) | 315307.115 | 10058400.4 | 0.978778 | 1.36416E-06 | volume |
| Phenol, 2,4,5-trichloro-                | phenols   | 26.7 | 1.29 | Volume(-) | 329541.557 | 8884883.42 | 0.953355 | 1.21679E-06 | volume |
| 1-Naphthalenol                          | phenols   | 30.1 | 1.98 | Volume(-) | 516104.751 | 10297562.6 | 0.996501 | 1.01218E-06 | volume |
| 2-Naphthalenol                          | phenols   | 30.3 | 2.04 | Volume(-) | 1126467.21 | 17204599   | 0.997854 | 5.08909E-07 | volume |
| Pyridine, 3,5-dichloro-                 | Pyridines | 15.9 | 1.08 | Volume(-) | 656722.314 | 12940893.5 | 0.976672 | 5.87393E-07 | volume |
| Cyclotetrasiloxane,<br>octamethyl-(D4)  | siloxanes | 16.5 | 6.21 | Volume(-) | 302876.828 | 19176043.3 | 0.952888 | 8.72126E-07 | volume |
| Cyclopentasiloxane,<br>decamethyl-(D5)  | siloxanes | 21.5 | 6.24 | Volume(-) | 167993.887 | 15440281.7 | 0.992134 | 1.09289E-06 | volume |
| Cyclohexasiloxane,<br>dodecamethyl-(D6) | siloxanes | 26.4 | 6.21 | Volume(-) | 128048.569 | 9832029.38 | 0.997709 | 1.62309E-06 | volume |

45

46



47 **Table S3.** Chemicals quantified, with volatility and polarity bins, MIR, *k*OH, and SOA yields. The SOA yields of precursors were from literature  
 48 (Loza et al., 2014; Harvey and Petrucci, 2015; Tkacik et al., 2012; Shah et al., 2020; McDonald et al., 2018; Chan et al., 2010, 2009; Wu et al.,  
 49 2017; Li et al., 2016; Matsunaga et al., 2009; Algrim and Ziemann, 2019, 2016; Liu et al., 2018; Charan et al., 2020) or surrogates from  
 50 *n*-alkanes in the same volatility bins (Zhao et al., 2014, 2017).

| compound                             | class_detail | bins      | VBS         | VOCs  | bins_2D | MIR  | <i>k</i> OH<br>(10 <sup>12</sup> ) | <i>k</i> OH_reference    | yield | yield_surrogate | yield_reference   |
|--------------------------------------|--------------|-----------|-------------|-------|---------|------|------------------------------------|--------------------------|-------|-----------------|-------------------|
| Acetic acid                          | acids        | B8_before | more_than_6 | VOCs  | P2      | 0.68 | 0.622                              | AopWin                   |       |                 |                   |
| Propanoic acid                       | acids        | B8_before | more_than_6 | VOCs  | P2      | 1.22 | 1.3878                             | AopWin                   |       |                 |                   |
| Propanoic acid, 2-methyl-            | acids        | B8_before | more_than_6 | VOCs  | P3      | 1.2  | 2.3096                             | AopWin                   |       |                 |                   |
| Butanoic acid                        | acids        | B8        | more_than_6 | VOCs  | P2      | 1.82 | 2.6977                             | AopWin                   |       |                 |                   |
| Maleic anhydride                     | acids        | B8        | more_than_6 | VOCs  | P6      | 1.82 |                                    |                          |       |                 |                   |
| Isocrotonic acid                     | acids        | B8        | more_than_6 | VOCs  | P2      | 1.82 |                                    |                          |       |                 |                   |
| 2,5-Furandione,<br>dihydro-3-methyl- | acids        | B10       | more_than_6 | VOCs  | P6      |      |                                    |                          |       |                 |                   |
| Benzoic acid                         | acids        | B12       | 6           | IVOCs | P3      |      | 1.242                              | AopWin v1.92             | 0.02  | C12             | Chan et al., 2009 |
| Nonanoic acid                        | acids        | B13       | 6           | IVOCs | P2      |      | 9.763                              | AopWin v1.92             | 0.03  | C13             | Chan et al., 2009 |
| 1,2-Benzenedicarboxylic acid         | acids        | B13       | 6           | IVOCs | P5      | 2.58 | 0.7492                             |                          |       |                 |                   |
| 2-Propanone, 1-hydroxy-              | alcohols     | B8_before | more_than_6 | VOCs  | P3      | 3.23 | 2.6938                             | AopWin                   |       |                 |                   |
| 1-Butanol                            | alcohols     | B8_before | more_than_6 | VOCs  | P2      | 2.88 | 8.5                                | (Atkinson and Arey,2003) | 0     |                 | Wu et al., 2017   |
| 1-Hydroxy-2-butanone                 | alcohols     | B8_before | more_than_6 | VOCs  | P3      |      |                                    |                          |       |                 |                   |
| 2-Furanol, tetrahydro-               | alcohols     | B8        | more_than_6 | VOCs  | P2      |      |                                    |                          |       |                 |                   |
| 1-Hexen-3-ol                         | alcohols     | B8        | more_than_6 | VOCs  | P2      | 2.88 | 8.5                                |                          |       |                 |                   |
| 2-Furanmethanol, tetrahydro-         | alcohols     | B8        | more_than_6 | VOCs  | P3      | 3.31 | 23.5819                            | AopWin                   |       |                 |                   |
| 3-Penten-1-ol, 3-methyl-             | alcohols     | B8        | more_than_6 | VOCs  | P3      | 2.88 | 8.5                                |                          |       |                 |                   |
| 2-Hexen-1-ol, (E)-                   | alcohols     | B9        | more_than_6 | VOCs  | P3      | 2.88 | 8.5                                |                          |       |                 |                   |
| 4-Hepten-1-ol                        | alcohols     | B9        | more_than_6 | VOCs  | P3      | 2.88 | 8.5                                |                          |       |                 |                   |

|                                                                                               |          |     |             |       |    |      |          |              |     |                                    |
|-----------------------------------------------------------------------------------------------|----------|-----|-------------|-------|----|------|----------|--------------|-----|------------------------------------|
| <b>2-Cyclohexen-1-ol</b>                                                                      | alcohols | B9  | more_than_6 | VOCs  | P4 | 2.88 |          |              |     |                                    |
| <b>2-Cyclopenten-1-one,</b><br><b>2-hydroxy-</b>                                              | alcohols | B9  | more_than_6 | VOCs  | P4 | 2.88 |          |              |     |                                    |
| <b>Ethanol, 2-butoxy-</b>                                                                     | alcohols | B9  | more_than_6 | VOCs  | P2 | 2.9  | 23.5134  | AopWin       |     |                                    |
| <b>Cyclopropanemethanol,</b><br><b><math>\alpha</math>-methyl-<math>\alpha</math>-propyl-</b> | alcohols | B10 | more_than_6 | VOCs  | P4 |      |          |              |     |                                    |
| <b>4-Hepten-3-ol, 4-methyl-</b>                                                               | alcohols | B10 | more_than_6 | VOCs  | P3 | 2.88 |          |              |     |                                    |
| <b>2-Propanol,</b><br><b>1-(2-methoxypropoxy)-</b>                                            | alcohols | B10 | more_than_6 | VOCs  | P2 | 1.83 |          |              |     |                                    |
| <b>2-Propanol, 1,1'-oxybis-</b>                                                               | alcohols | B10 | more_than_6 | VOCs  | P3 | 2.31 | 31.3336  | AopWin       |     |                                    |
| <b>Benzyl alcohol</b>                                                                         | alcohols | B10 | more_than_6 | VOCs  | P3 | 5.11 | 8.2541   | AopWin       | 0.6 | Charan et al., 2020                |
| <b>1,2-Cyclohexanediol</b>                                                                    | alcohols | B10 | more_than_6 | VOCs  | P4 |      |          |              |     |                                    |
| <b>1-Hexanol, 2-ethyl-</b>                                                                    | alcohols | B10 | more_than_6 | VOCs  | P2 | 2    | 13.2292  | AopWin v1.92 |     |                                    |
| <b>1-Propanol, 2,2'-oxybis-</b>                                                               | alcohols | B10 | more_than_6 | VOCs  | P3 |      |          |              |     |                                    |
| <b>2-Propyl-1-pentanol</b>                                                                    | alcohols | B11 | more_than_6 | VOCs  | P2 | 2    |          |              |     |                                    |
| <b>Benzenemethanol, <math>\alpha,\alpha</math>-dimethyl-</b>                                  | alcohols | B11 | more_than_6 | VOCs  | P3 |      |          |              | 0.6 | Benzyl alcohol Charan et al., 2020 |
| <b>7-Octen-2-ol, 2,6-dimethyl-</b>                                                            | alcohols | B11 | more_than_6 | VOCs  | P2 | 2.88 |          |              |     |                                    |
| <b>1-Nonanol</b>                                                                              | alcohols | B11 | more_than_6 | VOCs  | P2 |      | 13.9553  | AopWin v1.92 |     |                                    |
| <b>Cyclohexanol,</b><br><b>1-methyl-4-(1-methylethenyl)-</b>                                  | alcohols | B11 | more_than_6 | VOCs  | P2 |      |          |              |     |                                    |
| <b>3,7-Octadiene-2,6-diol,</b><br><b>2,6-dimethyl-</b>                                        | alcohols | B12 | 6           | IVOCs | P2 |      |          |              |     |                                    |
| <b><math>\alpha</math>-Terpineol</b>                                                          | alcohols | B12 | 6           | IVOCs | P2 | 4.63 | 103.0734 | AopWin       |     |                                    |
| <b>1,4:3,6-Dianhydro-<math>\alpha</math>-D-gluco-</b><br><b>anose</b>                         | alcohols | B12 | 6           | IVOCs | P5 |      |          |              |     |                                    |
| <b>Cyclohexanol,</b><br><b>4-(1,1-dimethylethyl)-</b>                                         | alcohols | B12 | 6           | IVOCs | P2 |      |          |              |     |                                    |
| <b>1-Octanol, 2-butyl-</b>                                                                    | alcohols | B12 | 6           | IVOCs | P2 |      | 13.9553  | AopWin v1.92 |     |                                    |

|                                       |           |           |             |       |    |       |         |                            |       |                 |                                         |
|---------------------------------------|-----------|-----------|-------------|-------|----|-------|---------|----------------------------|-------|-----------------|-----------------------------------------|
| <b>2-Decen-1-ol, (E)-</b>             | alcohols  | B12       | 6           | IVOCs | P2 | 2.88  | 13.9553 | AopWin v1.92               |       |                 |                                         |
| <b>Eugenol</b>                        | alcohols  | B13       | 6           | IVOCs | P3 |       |         |                            |       |                 |                                         |
| <b>Cedrol</b>                         | alcohols  | B16       | 5           | IVOCs | P3 |       | 20.1453 | AopWin v1.92               | 0.08  | C15             | Chan et al., 2009                       |
| <b>Patchouli alcohol</b>              | alcohols  | B17       | 4           | IVOCs | P3 |       |         |                            |       |                 |                                         |
| <b>Methyl glyoxal</b>                 | aldehydes | B8_before | more_than_6 | VOCs  | P1 | 16.56 | 15      | (Atkinson and Arey,2003)   |       |                 |                                         |
| <b>2-Butenal, (E)-</b>                | aldehydes | B8_before | more_than_6 | VOCs  | P8 |       | 35      | (A. W. H. Chan et al,2010) | 0.02  |                 | Chan et al., 2010;<br>Fang et al., 2017 |
| <b>2-Butenal, 2-methyl-</b>           | aldehydes | B8_before | more_than_6 | VOCs  | P4 |       | 35      |                            | 0.02  | 2-Butenal, (E)- | Chan et al., 2010;<br>Fang et al., 2017 |
| <b>Succindialdehyde</b>               | aldehydes | B8_before | more_than_6 | VOCs  | P5 |       |         |                            |       |                 |                                         |
| <b>Furfural</b>                       | aldehydes | B8        | more_than_6 | VOCs  | P4 | 4.35  | 37.4206 | AopWin                     |       |                 |                                         |
| <b>2-Hexenal, (E)-</b>                | aldehydes | B8        | more_than_6 | VOCs  | P3 | 4.35  | 35      |                            | 0.02  | 2-Butenal, (E)- | Chan et al., 2010;<br>Fang et al., 2017 |
| <b>Glutaraldehyde</b>                 | aldehydes | B9        | more_than_6 | VOCs  | P4 | 4.31  | 46.8857 | AopWin                     |       |                 |                                         |
| <b>2-Butenal, 2-ethenyl-</b>          | aldehydes | B9        | more_than_6 | VOCs  | P3 |       | 35      |                            |       |                 |                                         |
| <b>2-Pentenal, 2-methyl-</b>          | aldehydes | B9        | more_than_6 | VOCs  | P5 |       | 35      |                            | 0.02  | 2-Butenal, (E)- | Chan et al., 2010;<br>Fang et al., 2017 |
| <b>Hexanal, 2-ethyl-</b>              | aldehydes | B9        | more_than_6 | VOCs  | P2 | 4.35  | 30      |                            | 0.02  | 2-Butenal, (E)- | Chan et al., 2010;<br>Fang et al., 2017 |
| <b>Benzaldehyde</b>                   | aldehydes | B9        | more_than_6 | VOCs  | P3 |       | 12      | (Atkinson and Arey,2003)   | 0.38  |                 | Fang et al., 2017                       |
| <b>Octanal</b>                        | aldehydes | B10       | more_than_6 | VOCs  | P4 | 3.16  | 31.657  | AopWin v1.92               | 0.026 |                 | Chan et al., 2010                       |
| <b>Nonanal</b>                        | aldehydes | B11       | more_than_6 | VOCs  | P2 | 3.16  | 33.07   | AopWin v1.92               | 0.026 |                 | Chan et al., 2010                       |
| <b>(Z)-3-Phenylacrylaldehyde</b>      | aldehydes | B12       | 6           | IVOCs | P4 |       |         |                            |       |                 |                                         |
| <b>Decanal</b>                        | aldehydes | B12       | 6           | IVOCs | P2 | 3.16  | 34.48   | AopWin v1.92               | 0.026 |                 | Chan et al., 2010                       |
| <b>Undecanal</b>                      | aldehydes | B13       | 6           | IVOCs | P2 | 3.16  |         |                            | 0.026 |                 | Chan et al., 2010                       |
| <b>2-Propenal, 2-methyl-3-phenyl-</b> | aldehydes | B13       | 6           | IVOCs | P4 |       |         |                            |       |                 |                                         |
| <b>Vanillin</b>                       | aldehydes | B14       | 6           | IVOCs | P4 |       | 12      |                            | 0.026 |                 | Chan et al., 2010                       |
| <b>Octanal, 2-(phenylmethylene)-</b>  | aldehydes | B17       | 4           | IVOCs | P3 | 2.96  | 54.9612 | AopWin                     |       |                 |                                         |

|                                        |           |           |             |       |    |      |         |                          |       |                   |                          |
|----------------------------------------|-----------|-----------|-------------|-------|----|------|---------|--------------------------|-------|-------------------|--------------------------|
| <b>C7-ene</b>                          | n-alkenes | B8_before | more_than_6 | VOCs  | P4 | 4.43 | 40      | (Atkinson and Arey,2003) | 0.015 |                   | Wu et al., 2017          |
| <b>C8-ene</b>                          | n-alkenes | B8        | more_than_6 | VOCs  | P4 | 3.25 | 33.0041 | AopWin                   | 0.015 | C7-ene            | Wu et al., 2017          |
| <b>C9-ene</b>                          | n-alkenes | B9        | more_than_6 | VOCs  | P1 | 2.6  | 34.4171 | AopWin                   | 0.154 |                   | Matsunaga,<br>Aiko,2009  |
| <b>C10-ene</b>                         | n-alkenes | B10       | more_than_6 | VOCs  | P1 | 2.17 | 35.8302 | AopWin                   | 0.317 |                   | Matsunaga,<br>Aiko,2009  |
| <b>C11-ene</b>                         | n-alkenes | B11       | more_than_6 | VOCs  | P1 | 1.87 | 37.2432 | AopWin                   | 0.344 |                   | Matsunaga,<br>Aiko,2009  |
| <b>C12-ene</b>                         | n-alkenes | B12       | 6           | IVOCs | P1 | 1.64 | 38.6563 | AopWin                   | 0.468 |                   | Matsunaga,<br>Aiko,2009  |
| <b>C13-ene</b>                         | n-alkenes | B13       | 6           | IVOCs | P2 | 1.48 | 40.0693 | AopWin                   | 0.459 |                   | Matsunaga,<br>Aiko,2009  |
| <b>C14-ene</b>                         | n-alkenes | B14       | 6           | IVOCs | P2 | 1.34 | 41.4824 | AopWin                   | 0.501 |                   | Matsunaga,<br>Aiko,2009  |
| <b>1,3-Nonadiene, (E)-</b>             | alkenes   | B9        | more_than_6 | VOCs  | P2 |      | 37.2432 |                          |       |                   |                          |
| <b><math>\beta</math>-Pinene</b>       | alkenes   | B10       | more_than_6 | VOCs  | P2 | 3.52 | 74.3    | (Atkinson and Arey,2003) | 0.17  |                   | Lee et al., 2006         |
| <b>Cyclohexene,</b>                    | alkenes   | B10       | more_than_6 | VOCs  | P2 |      |         |                          |       |                   |                          |
| <b>4-(1,1-dimethylethyl)-</b>          |           |           |             |       |    |      |         |                          |       |                   |                          |
| <b>Limonene</b>                        | alkenes   | B10       | more_than_6 | VOCs  | P2 | 4.55 | 164     | (Atkinson and Arey,2003) | 0.13  |                   | McDonald et al.,<br>2018 |
| <b><math>\beta</math>-Ocimene</b>      | alkenes   | B10       | more_than_6 | VOCs  | P2 | 4.55 | 252     | (Atkinson and Arey,2003) | 0.13  | Limonene          | McDonald et al.,<br>2018 |
| <b>Longifolene</b>                     | alkenes   | B14       | 6           | IVOCs | P2 | 4.55 | 47      | (Atkinson and Arey,2003) | 0.13  | Limonene          | McDonald et al.,<br>2018 |
| <b><math>\alpha</math>-Cedrene</b>     | alkenes   | B14       | 6           | IVOCs | P2 | 4.55 | 67      | (Atkinson and Arey,2003) | 0.55  |                   | Jaoui et al., 2013       |
| <b>8,9-Dimethylbicyclo[4.4.1]undec</b> | alkenes   | B15       | 5           | IVOCs | P4 |      |         |                          | 0.55  | $\alpha$ -Cedrene | Jaoui et al., 2013       |
| <b>a-2,4,8-triene</b>                  |           |           |             |       |    |      |         |                          |       |                   |                          |
| <b>Aromandendrene</b>                  | alkenes   | B15       | 5           | IVOCs | P2 | 4.55 | 67      |                          | 0.55  | $\alpha$ -Cedrene | Jaoui et al., 2013       |

|                                                             |           |           |             |       |    |      |         |                          |       |                      |                    |  |  |
|-------------------------------------------------------------|-----------|-----------|-------------|-------|----|------|---------|--------------------------|-------|----------------------|--------------------|--|--|
| <b>4,9:5,8-Dimethano-1H-benz[f]indene,</b>                  | alkenes   | B16       | 5           | IVOCs | P3 |      |         |                          |       |                      |                    |  |  |
| <b>3a,4,4a,5,8,8a,9,9a-octahydro-Kaur-16-ene, (8β,13β)-</b> | alkenes   | B21       | 3           | IVOCs | P3 | 4.55 | 67      |                          | 0.55  | α-Cedrene            | Jaoui et al., 2013 |  |  |
| <b>Benzene</b>                                              | aromatics | B8_before | more_than_6 | VOCs  | P2 | 0.72 | 1.22    | (Atkinson and Arey,2003) | 0.19  |                      | Chan et al., 2009  |  |  |
| <b>Toluene</b>                                              | aromatics | B8        | more_than_6 | VOCs  | P2 | 4    | 5.63    | (Atkinson and Arey,2003) | 0.1   |                      | Chan et al., 2009  |  |  |
| <b>Ethylbenzene</b>                                         | aromatics | B9        | more_than_6 | VOCs  | P2 | 3.04 | 7       | (Atkinson and Arey,2003) | 0.1   |                      | Chan et al., 2009  |  |  |
| <b>p-Xylene</b>                                             | aromatics | B9        | more_than_6 | VOCs  | P2 | 5.84 | 14.3    | (Atkinson and Arey,2003) | 0.06  |                      | Chan et al., 2009  |  |  |
| <b>Phenylethyne</b>                                         | aromatics | B9        | more_than_6 | VOCs  | P2 |      | 58      |                          | 0.22  | Styrene              | Fang et al., 2017  |  |  |
| <b>Styrene</b>                                              | aromatics | B9        | more_than_6 | VOCs  | P2 | 1.73 | 58      | (Atkinson and Arey,2003) | 0.22  |                      | Fang et al., 2017  |  |  |
| <b>o-Xylene</b>                                             | aromatics | B9        | more_than_6 | VOCs  | P2 | 7.64 | 13.6    | (Atkinson and Arey,2003) | 0.06  |                      | Chan et al., 2009  |  |  |
| <b>Bicyclo[4.2.0]octa-1,3,5-triene</b>                      | aromatics | B9        | more_than_6 | VOCs  | P2 |      |         |                          |       |                      |                    |  |  |
| <b>Benzene-C3-ene</b>                                       | aromatics | B9        | more_than_6 | VOCs  | P2 | 2.03 |         |                          | 0.1   | Benzene-C3           | Chan et al., 2009  |  |  |
| <b>Benzene, 2-propenyl-</b>                                 | aromatics | B10       | more_than_6 | VOCs  | P2 | 1.53 | 32.0791 | AopWin                   | 0.1   | Benzene-C3           | Chan et al., 2009  |  |  |
| <b>Benzene-C3</b>                                           | aromatics | B9        | more_than_6 | VOCs  | P2 | 2.03 | 5.8     | (Atkinson and Arey,2003) | 0.1   |                      | Chan et al., 2009  |  |  |
| <b>Indane</b>                                               | aromatics | B10       | more_than_6 | VOCs  | P3 | 3.32 | 19      | (Atkinson and Arey,2003) | 0.077 |                      | Gentner, 2012      |  |  |
| <b>Indene</b>                                               | aromatics | B10       | more_than_6 | VOCs  | P3 | 1.55 | 78      | (Atkinson and Arey,2003) | 0.05  |                      | Fang et al., 2017  |  |  |
| <b>Indan, 1-methyl-</b>                                     | aromatics | B11       | more_than_6 | VOCs  | P2 | 3.32 | 19      |                          | 0.077 | Indane               | Gentner, 2012      |  |  |
| <b>Benzene-C4-ene</b>                                       | aromatics | B11       | more_than_6 | VOCs  | P2 | 2.36 | 8.723   |                          | 0.1   | Benzene-C3           | Chan et al., 2009  |  |  |
| <b>Benzene-C4</b>                                           | aromatics | B10       | more_than_6 | VOCs  | P2 | 2.36 | 8.723   | AopWin                   | 0.1   | Benzene-C3           | Chan et al., 2009  |  |  |
| <b>1H-Indene,</b>                                           | aromatics | B11       | more_than_6 | VOCs  | P3 |      | 78      |                          | 0.05  | Indene               | Fang et al., 2017  |  |  |
| <b>2,3-dihydro-4-methyl-</b>                                |           |           |             |       |    |      |         |                          |       |                      |                    |  |  |
| <b>1H-Indene, 3-methyl-</b>                                 | aromatics | B11       | more_than_6 | VOCs  | P3 | 1.55 | 78      |                          | 0.05  | Indene               | Fang et al., 2017  |  |  |
| <b>Benzene-C6</b>                                           | aromatics | B11       | more_than_6 | VOCs  | P2 | 2.12 | 10.1361 |                          | 0.1   | Benzene-C3           | Chan et al., 2009  |  |  |
| <b>Naphthalene,</b>                                         | aromatics | B13       | 6           | IVOCs | P3 | 2.97 | 34      |                          | 0.12  | Benzene,             | Gentner, 2012      |  |  |
| <b>1,2,3,4-tetrahydro,C1</b>                                |           |           |             |       |    |      |         |                          |       | 1,2,3,4-tetramethyl- |                    |  |  |
| <b>1H-Indene,</b>                                           | aromatics | B13       | 6           | IVOCs | P3 |      |         |                          | 0.05  | Indene               | Fang et al., 2017  |  |  |

|                                                   |             |     |             |       |    |       |         |                            |       |                           |                          |
|---------------------------------------------------|-------------|-----|-------------|-------|----|-------|---------|----------------------------|-------|---------------------------|--------------------------|
| <b>2,3-dihydro-4,7-dimethyl-</b>                  |             |     |             |       |    |       |         |                            |       |                           |                          |
| <b>Biphenyl</b>                                   | aromatics   | B14 | 6           | IVOCs | P3 | 3.34  | 7.1     | (Atkinson and Arey,2003)   | 0.26  | Naphthalene               | Chan et al., 2009        |
| <b>Biphenyl-C1</b>                                | aromatics   | B15 | 5           | IVOCs | P3 | 3.34  | 7.1     |                            | 0.33  | Naphthalene,<br>1-methyl- | Chan et al., 2009        |
| <b>3,4,4a,9a-Tetrahydrofluorene</b>               | aromatics   | B15 | 5           | IVOCs | P3 |       |         |                            |       |                           |                          |
| <b>Benzene,</b>                                   | aromatics   | B17 | 4           | IVOCs | P4 |       | 10.1361 |                            |       |                           |                          |
| <b>1,1'-(1,2-cyclobutanediyl)bis-,<br/>trans-</b> |             |     |             |       |    |       |         |                            |       |                           |                          |
| <b>Hexane, 2,4-dimethyl-</b>                      | b-alkanes   | B8  | more_than_6 | VOCs  | P4 | 1.73  | 8.5522  | AopWin                     |       |                           |                          |
| <b>B10_b_alkanes_UCM</b>                          | b-alkanes   | B9  | more_than_6 | VOCs  | P1 | 0.68  | 11      | (Atkinson and Arey,2003)   | 0.22  | C10                       | Wu et al., 2017          |
| <b>B10_b_alkanes</b>                              | b-alkanes   | B10 | more_than_6 | VOCs  | P1 | 0.68  | 11      |                            | 0.22  | C10                       | Wu et al., 2017          |
| <b>B12_b_alkanes_UCM</b>                          | b-alkanes   | B12 | 6           | IVOCs | P1 | 0.55  | 13.2    | (Atkinson and Arey,2003)   | 0.02  | C12                       | Chan et al., 2009        |
| <b>B13_b_alkanes_UCM</b>                          | b-alkanes   | B13 | 6           | IVOCs | P1 | 0.53  | 15.1    | (Atkinson and Arey,2003)   | 0.03  | C13                       | Chan et al., 2009        |
| <b>B14_b_alkanes_UCM</b>                          | b-alkanes   | B14 | 6           | IVOCs | P1 | 0.51  | 17.9    | (Atkinson and Arey,2003)   | 0.05  | C14                       | Chan et al., 2009        |
| <b>B15_b_alkanes_UCM</b>                          | b-alkanes   | B15 | 5           | IVOCs | P1 | 0.5   | 20.7    | (Atkinson and Arey,2003)   | 0.08  | C15                       | Chan et al., 2009        |
| <b>B16_b_alkanes_UCM</b>                          | b-alkanes   | B15 | 5           | IVOCs | P1 | 0.45  | 23.2    | (Atkinson and Arey,2003)   | 0.12  | C16                       | Chan et al., 2009        |
| <b>B17_b_alkanes_UCM</b>                          | b-alkanes   | B17 | 4           | IVOCs | P1 | 0.42  | 28.5    | (A. W. H. Chan et al,2009) | 0.2   | C17                       | Chan et al., 2009        |
| <b>B18_b_alkanes_UCM</b>                          | b-alkanes   | B18 | 4           | IVOCs | P1 | 0.4   | 35.1    | (A. W. H. Chan et al,2009) | 0.3   | C18                       | Chan et al., 2009        |
| <b>B19_b_alkanes_UCM</b>                          | b-alkanes   | B18 | 4           | IVOCs | P1 | 0.38  | 43.2    | (A. W. H. Chan et al,2009) | 0.42  | C19                       | Chan et al., 2009        |
| <b>B20_b_alkanes_UCM</b>                          | b-alkanes   | B20 | 3           | IVOCs | P1 | 0.36  | 53.1    | (A. W. H. Chan et al,2009) | 0.56  | C20                       | Chan et al., 2009        |
| <b>B21_b_alkanes_UCM</b>                          | b-alkanes   | B21 | 3           | IVOCs | P2 | 0.34  | 26.654  | AopWin v1.92               | 0.77  | C21                       | Gentner, 2012            |
| <b>Benzene, 1,3-dichloro-</b>                     | chlorides   | B10 | more_than_6 | VOCs  | P3 | 0.178 | 0.9649  | AopWin v1.92               |       |                           |                          |
| <b>Cyclohexane-C7</b>                             | cyclohexane | B14 | 6           | IVOCs | P1 | 0.55  | 19.0567 | AopWin                     | 0.55  | Cyclohexane-C4            | Wu et al., 2017          |
|                                                   | s           |     |             |       |    |       |         |                            |       |                           |                          |
| <b>Cyclohexane-C8</b>                             | cyclohexane | B14 | 6           | IVOCs | P2 | 0.51  | 20.4697 | AopWin                     | 0.55  | Cyclohexane-C4            | Wu et al., 2017          |
|                                                   | s           |     |             |       |    |       |         |                            |       |                           |                          |
| <b>Cyclohexane-C9</b>                             | cyclohexane | B16 | 5           | IVOCs | P2 | 0.47  | 21.8828 | AopWin                     | 0.613 |                           | Lim and<br>Ziemann, 2009 |
|                                                   | s           |     |             |       |    |       |         |                            |       |                           |                          |

|                                                   |                  |           |             |       |    |       |         |              |       |                |                          |
|---------------------------------------------------|------------------|-----------|-------------|-------|----|-------|---------|--------------|-------|----------------|--------------------------|
| <b>Cyclohexane-C10</b>                            | cyclohexane<br>s | B17       | 4           | IVOCs | P2 | 0.43  | 23.2958 | AopWin       | 0.613 | Cyclohexane-C9 | Lim and<br>Ziemann, 2009 |
| <b>Propanoic acid, ethenyl ester</b>              | esters           | B8_before | more_than_6 | VOCs  | P2 |       |         |              |       |                |                          |
| <b>Methyl methacrylate</b>                        | esters           | B8_before | more_than_6 | VOCs  | P6 | 15.61 | 18.3436 | AopWin v1.92 |       |                |                          |
| <b>Acetic acid, hydroxy-, methyl ester</b>        | esters           | B8_before | more_than_6 | VOCs  | P2 |       |         |              |       |                |                          |
| <b>Acetic acid, butyl ester</b>                   | esters           | B8        | more_than_6 | VOCs  | P2 | 0.83  | 4.6094  | AopWin       |       |                |                          |
| <b>Butyrolactone</b>                              | esters           | B9        | more_than_6 | VOCs  | P6 | 0.96  | 2.3087  | AopWin       |       |                |                          |
| <b>2(5H)-Furanone</b>                             | esters           | B9        | more_than_6 | VOCs  | P6 | 0.96  | 12.2364 |              |       |                |                          |
| <b>2(5H)-Furanone, 5-methyl-</b>                  | esters           | B9        | more_than_6 | VOCs  | P5 | 0.96  | 12.2364 |              |       |                |                          |
| <b>2(3H)-Furanone, dihydro-3-methyl-</b>          | esters           | B9        | more_than_6 | VOCs  | P5 | 0.96  | 2.7214  | AopWin v1.92 |       |                |                          |
| <b>2(3H)-Furanone, dihydro-5-methyl-</b>          | esters           | B9        | more_than_6 | VOCs  | P5 | 0.96  | 2.7214  |              |       |                |                          |
| <b>2(5H)-Furanone, 5,5-dimethyl-</b>              | esters           | B9        | more_than_6 | VOCs  | P4 | 0.96  | 2.7214  |              |       |                |                          |
| <b>2(5H)-Furanone, 3-methyl-</b>                  | esters           | B9        | more_than_6 | VOCs  | P5 | 0.96  | 12.2364 |              |       |                |                          |
| <b>Methyl 2-furoate</b>                           | esters           | B10       | more_than_6 | VOCs  | P3 |       |         |              |       |                |                          |
| <b>4-Methyl-5H-furan-2-one</b>                    | esters           | B10       | more_than_6 | VOCs  | P5 |       |         |              |       |                |                          |
| <b>2-Furanone, 2,5-dihydro-3,5-dimethyl</b>       | esters           | B10       | more_than_6 | VOCs  | P4 |       |         |              |       |                |                          |
| <b>2-Hydroxy-gamma-butyrolactone</b>              | esters           | B10       | more_than_6 | VOCs  | P5 |       |         |              |       |                |                          |
| <b>Benzofuran</b>                                 | esters           | B10       | more_than_6 | VOCs  | P3 |       |         |              |       |                |                          |
| <b>2H-Pyran-2-one, tetrahydro-</b>                | esters           | B10       | more_than_6 | VOCs  | P6 |       |         |              |       |                |                          |
| <b>2-Oxepanone</b>                                | esters           | B10       | more_than_6 | VOCs  | P6 |       |         |              |       |                |                          |
| <b>2,3-Dimethyl-4-hydroxy-2-buten oic lactone</b> | esters           | B10       | more_than_6 | VOCs  | P4 |       |         |              |       |                |                          |
| <b>Formic acid, phenylmethyl ester</b>            | esters           | B11       | more_than_6 | VOCs  | P3 |       |         |              |       |                |                          |

|                                                              |        |           |             |       |    |      |         |              |
|--------------------------------------------------------------|--------|-----------|-------------|-------|----|------|---------|--------------|
| <b>Benzoic acid, methyl ester</b>                            | esters | B11       | more_than_6 | VOCs  | P3 |      | 0.844   | AopWin v1.92 |
| <b>Pentanedioic acid, dimethyl ester</b>                     | esters | B11       | more_than_6 | VOCs  | P3 | 0.42 | 2.5605  | AopWin       |
| <b>Acetic acid, phenylmethyl ester</b>                       | esters | B11       | more_than_6 | VOCs  | P3 |      |         |              |
| <b>Benzoic acid, ethyl ester</b>                             | esters | B11       | more_than_6 | VOCs  | P3 |      | 0.844   |              |
| <b>Hexanedioic acid, dimethyl ester</b>                      | esters | B12       | 6           | IVOCs | P3 | 1.8  | 3.9736  | AopWin       |
| <b>Acetic acid, 2-phenylethyl ester</b>                      | esters | B12       | 6           | IVOCs | P3 |      |         |              |
| <b>Linalyl acetate</b>                                       | esters | B12       | 6           | IVOCs | P2 |      |         |              |
| <b>n-Butyric acid 2-ethylhexyl ester</b>                     | esters | B13       | 6           | IVOCs | P2 |      |         |              |
| <b>Cyclohexanol, 4-(1,1-dimethylethyl)-, acetate, trans-</b> | esters | B13       | 6           | IVOCs | P2 |      |         |              |
| <b><math>\alpha</math>-Terpinyl acetate</b>                  | esters | B13       | 6           | IVOCs | P2 |      |         |              |
| <b>Cyclohexanol, 4-(1,1-dimethylethyl)-, acetate, cis-</b>   | esters | B14       | 6           | IVOCs | P2 |      |         |              |
| <b>Pentanoic acid, 2-ethylhexyl ester</b>                    | esters | B14       | 6           | IVOCs | P2 |      |         |              |
| <b>Verdyl acetate</b>                                        | esters | B14       | 6           | IVOCs | P3 |      |         |              |
| <b>1,6-Dioxacyclododecane-7,12-dione</b>                     | esters | B15       | 5           | IVOCs | P4 |      |         |              |
| <b>Benzoic acid, hept-3-yl ester</b>                         | esters | B15       | 5           | IVOCs | P3 |      |         |              |
| <b>2,2,4-Trimethyl-1,3-pentanediol diisobutyrate</b>         | esters | B16       | 5           | IVOCs | P2 | 0.38 | 11.4614 | AopWin       |
| <b>n-Hexyl salicylate</b>                                    | esters | B17       | 4           | IVOCs | P2 |      |         |              |
| <b>Benzoic acid, 2-ethylhexyl ester</b>                      | esters | B17       | 4           | IVOCs | P2 | 0.98 | 11.5368 | AopWin       |
| <b>1,4-Dioxin, 2,3-dihydro-</b>                              | ethers | B8_before | more_than_6 | VOCs  | P2 |      |         |              |
| <b>Anisole</b>                                               | ethers | B9        | more_than_6 | VOCs  | P3 | 6.66 | 22.3336 | AopWin       |



|                                                                   |         |           |             |       |    |      |          |                          |      |                      |                   |
|-------------------------------------------------------------------|---------|-----------|-------------|-------|----|------|----------|--------------------------|------|----------------------|-------------------|
| <b>Oxepine, 2,7-dimethyl-</b>                                     | ethers  | B9        | more_than_6 | VOCs  | P2 |      |          |                          |      |                      |                   |
| <b>Furan, 2-butyltetrahydro-</b>                                  | ethers  | B10       | more_than_6 | VOCs  | P3 | 2.13 | 23.5632  | AopWin                   |      |                      |                   |
| <b>(2R,5R)-2-Methyl-5-(prop-1-en-2-yl)-2-vinyltetrahydrofuran</b> | ethers  | B10       | more_than_6 | VOCs  | P2 |      |          |                          |      |                      |                   |
| <b>Benzene, 1-methoxy-4-methyl-</b>                               | ethers  | B10       | more_than_6 | VOCs  | P3 |      |          |                          |      |                      |                   |
| <b>Benzofuran, 2-methyl-</b>                                      | ethers  | B11       | more_than_6 | VOCs  | P3 |      |          |                          |      |                      |                   |
| <b>Benzofuran, 4,7-dimethyl-</b>                                  | ethers  | B12       | 6           | IVOCs | P3 |      |          |                          |      |                      |                   |
| <b>Ether, <math>\alpha,\alpha</math>-dimethylbenzyl isopropyl</b> | ethers  | B13       | 6           | IVOCs | P3 |      |          |                          |      |                      |                   |
| <b>Benzofuran, 2,3-dihydro-</b>                                   | ethers  | B13       | 6           | IVOCs | P5 |      |          |                          |      |                      |                   |
| <b>Naphthalene, 2-methoxy-</b>                                    | ethers  | B14       | 6           | IVOCs | P4 |      |          |                          |      |                      |                   |
| <b>Dibenzofuran</b>                                               | ethers  | B15       | 5           | IVOCs | P4 |      | 7.0302   | AopWin v1.92             |      |                      |                   |
| <b>Oxacyclotetradeca-4,11-diyne</b>                               | ethers  | B17       | 4           | IVOCs | P3 |      |          |                          |      |                      |                   |
| <b>Furan, 2,5-dimethyl-</b>                                       | furans  | B8_before | more_than_6 | VOCs  | P5 | 7.88 | 129.881  | AopWin v1.92             | 0.38 |                      | Fang et al., 2017 |
| <b>2-Vinylfuran</b>                                               | furans  | B8_before | more_than_6 | VOCs  | P6 | 7.88 | 129.881  |                          | 0.38 | Furan, 2,5-dimethyl- | Fang et al., 2017 |
| <b>3,4-Dimethylfuran</b>                                          | furans  | B8        | more_than_6 | VOCs  | P3 | 9.15 | 129.881  |                          | 0.38 | Furan, 2,5-dimethyl- | Fang et al., 2017 |
| <b>Furan, 2-ethyl-5-methyl-</b>                                   | furans  | B8        | more_than_6 | VOCs  | P6 | 9.15 | 129.881  |                          | 0.38 | Furan, 2,5-dimethyl- | Fang et al., 2017 |
| <b>Furan, 2,3,5-trimethyl-</b>                                    | furans  | B8        | more_than_6 | VOCs  | P6 | 9.15 | 129.881  |                          | 0.38 | Furan, 2,5-dimethyl- | Fang et al., 2017 |
| <b>2-Furanmethanol</b>                                            | furans  | B8        | more_than_6 | VOCs  | P3 | 9.15 | 104.0454 | AopWin                   | 0.38 | Furan, 2,5-dimethyl- | Fang et al., 2017 |
| <b>Ethanone, 1-(2-furanyl)-</b>                                   | furans  | B9        | more_than_6 | VOCs  | P3 |      |          |                          |      |                      |                   |
| <b>2-Butanone, 3-methyl-</b>                                      | ketones | B8_before | more_than_6 | VOCs  | P4 | 1.48 | 2.9      | (Atkinson and Arey,2003) | 0    |                      | Shah et al., 2020 |
| <b>2-Pentanone</b>                                                | ketones | B8_before | more_than_6 | VOCs  | P6 | 2.81 | 4.4      | (Atkinson and Arey,2003) | 0    |                      | Shah et al., 2020 |
| <b>3-Pentanone</b>                                                | ketones | B8_before | more_than_6 | VOCs  | P6 | 1.24 | 2        | (Atkinson and Arey,2003) | 0    |                      | Shah et al., 2020 |

|                                             |         |           |             |      |    |      |     |                          |
|---------------------------------------------|---------|-----------|-------------|------|----|------|-----|--------------------------|
| <b>Acetoin</b>                              | ketones | B8_before | more_than_6 | VOCs | P2 |      |     |                          |
| <b>3-Penten-2-one, (E)-</b>                 | ketones | B8_before | more_than_6 | VOCs | P2 | 1.24 | 2   |                          |
| <b>Propanoic acid, 2-oxo-, methyl ester</b> | ketones | B8        | more_than_6 | VOCs | P4 |      |     |                          |
| <b>Cyclopentanone</b>                       | ketones | B8        | more_than_6 | VOCs | P3 | 1.15 | 2.9 | (Atkinson and Arey,2003) |
| <b>2-Hexanone</b>                           | ketones | B8        | more_than_6 | VOCs | P2 | 3.14 | 9.1 | (Atkinson and Arey,2003) |
| <b>2-Hydroxy-3-pentanone</b>                | ketones | B8        | more_than_6 | VOCs | P3 | 1.24 | 2   |                          |
| <b>1-Hydroxy-3-methyl-2-butanone</b>        | ketones | B8        | more_than_6 | VOCs | P3 | 1.48 |     |                          |
| <b>2-Cyclopenten-1-one</b>                  | ketones | B8        | more_than_6 | VOCs | P4 |      |     |                          |
| <b>2-Pentanone, 3-ethyl-</b>                | ketones | B8        | more_than_6 | VOCs | P4 | 1.24 | 2   |                          |
| <b>3-Hexen-2-one</b>                        | ketones | B8        | more_than_6 | VOCs | P2 | 3.14 | 9.1 |                          |
| <b>4-Hexen-3-one</b>                        | ketones | B8        | more_than_6 | VOCs | P3 | 3.14 | 9.1 |                          |
| <b>2-Propanone, 1-(acetyloxy)-</b>          | ketones | B8        | more_than_6 | VOCs | P4 |      |     |                          |
| <b>4-Cyclopentene-1,3-dione</b>             | ketones | B8        | more_than_6 | VOCs | P5 |      |     |                          |
| <b>Cyclopentanone, 2-methyl-</b>            | ketones | B9        | more_than_6 | VOCs | P4 | 1.24 |     |                          |
| <b>Cyclopentanone, 3-methyl-</b>            | ketones | B9        | more_than_6 | VOCs | P4 | 1.35 |     |                          |
| <b>2-Cyclopenten-1-one, 2-methyl-</b>       | ketones | B9        | more_than_6 | VOCs | P3 |      |     |                          |
| <b>3-Penten-2-one, 3,4-dimethyl-</b>        | ketones | B9        | more_than_6 | VOCs | P3 | 1.24 |     |                          |
| <b>2-Acetyl-2-methyltetrahydrofuran</b>     | ketones | B9        | more_than_6 | VOCs | P3 |      |     |                          |
| <b>2-Cyclopenten-1-one, 2,3-dimethyl-</b>   | ketones | B9        | more_than_6 | VOCs | P3 | 1.24 |     |                          |
| <b>3-Hepten-2-one</b>                       | ketones | B9        | more_than_6 | VOCs | P3 | 3.14 | 9.1 |                          |
| <b>3-Methyl-3-cyclohexen-1-one</b>          | ketones | B9        | more_than_6 | VOCs | P4 |      |     |                          |
| <b>2-Butanone, 1-(acetyloxy)-</b>           | ketones | B9        | more_than_6 | VOCs | P3 | 1.48 |     |                          |
| <b>2-Cyclopenten-1-one, 3-methyl-</b>       | ketones | B9        | more_than_6 | VOCs | P4 |      |     |                          |
| <b>5-Hepten-2-one, 6-methyl-</b>            | ketones | B10       | more_than_6 | VOCs | P2 |      |     |                          |
| <b>2-Cyclopenten-1-one,</b>                 | ketones | B9        | more_than_6 | VOCs | P3 |      |     |                          |

|                                           |         |     |             |       |    |        |                              |
|-------------------------------------------|---------|-----|-------------|-------|----|--------|------------------------------|
| <b>3,4-dimethyl-</b>                      |         |     |             |       |    |        |                              |
| <b>1,4-Cyclohex-2-enedione</b>            | ketones | B10 | more_than_6 | VOCs  | P4 | 6.4    |                              |
| <b>1,2-Cyclopentanedione,</b>             | ketones | B10 | more_than_6 | VOCs  | P3 |        |                              |
| <b>3-methyl-</b>                          |         |     |             |       |    |        |                              |
| <b>1,3-Cyclohexanedione, 2-methyl-</b>    | ketones | B10 | more_than_6 | VOCs  | P4 | 1.35   | 6.4                          |
| <b>1-(1,2-Dimethyl-cyclopent-2-enyl)-</b> | ketones | B10 | more_than_6 | VOCs  | P4 |        |                              |
| <b>l)-ethanone</b>                        |         |     |             |       |    |        |                              |
| <b>2-Cyclopenten-1-one,</b>               | ketones | B10 | more_than_6 | VOCs  | P3 |        |                              |
| <b>2,3,4-trimethyl-</b>                   |         |     |             |       |    |        |                              |
| <b>Cyclohexanone, 3-ethenyl-</b>          | ketones | B10 | more_than_6 | VOCs  | P4 | 1.35   |                              |
| <b>Acetophenone</b>                       | ketones | B10 | more_than_6 | VOCs  | P3 |        | 1.8795 AopWin v1.92          |
| <b>Levoglucosenone</b>                    | ketones | B11 | more_than_6 | VOCs  | P5 |        |                              |
| <b>Isophorone</b>                         | ketones | B11 | more_than_6 | VOCs  | P3 | 4.63   | 80.691 AopWin v1.92          |
| <b>Camphor</b>                            | ketones | B11 | more_than_6 | VOCs  | P3 | 0.49   | 4.3 (Atkinson and Arey,2003) |
| <b>Cyclohexanone, 4-acetyl-</b>           | ketones | B12 | 6           | IVOCs | P5 |        | 6.4                          |
| <b>1,2-Naphthalenedione</b>               | ketones | B12 | 6           | IVOCs | P4 |        |                              |
| <b>1H-Inden-1-one, 2,3-dihydro-</b>       | ketones | B13 | 6           | IVOCs | P4 |        |                              |
| <b>1H-Inden-1-one,</b>                    | ketones | B13 | 6           | IVOCs | P4 |        |                              |
| <b>2,3-dihydro-2-methyl-</b>              |         |     |             |       |    |        |                              |
| <b>1-Methylindan-2-one</b>                | ketones | B13 | 6           | IVOCs | P4 |        |                              |
| <b>2,3,6-Trimethylacetophenone</b>        | ketones | B13 | 6           | IVOCs | P3 |        |                              |
| <b>Ethanone,</b>                          | ketones | B13 | 6           | IVOCs | P3 |        |                              |
| <b>1-(2,4,6-trimethylphenyl)-</b>         |         |     |             |       |    |        |                              |
| <b>5,9-Undecadien-2-one,</b>              | ketones | B14 | 6           | IVOCs | P2 |        |                              |
| <b>6,10-dimethyl-</b>                     |         |     |             |       |    |        |                              |
| <b>2,5-Cyclohexadiene-1,4-dione,</b>      | ketones | B15 | 5           | IVOCs | P2 |        |                              |
| <b>2,6-bis(1,1-dimethylethyl)-</b>        |         |     |             |       |    |        |                              |
| <b>Benzophenone</b>                       | ketones | B16 | 5           | IVOCs | P4 | 3.5549 | AopWin v1.92                 |

|                                     |                               |           |             |       |    |      |         |                            |       |                   |
|-------------------------------------|-------------------------------|-----------|-------------|-------|----|------|---------|----------------------------|-------|-------------------|
| <b>Ethanone, 1,2-diphenyl-</b>      | ketones                       | B17       | 4           | IVOCs | P5 |      | 7.323   | AopWin v1.92               |       |                   |
| <b>C8</b>                           | n-alkanes                     | B8        | more_than_6 | VOCs  | P1 | 0.9  | 8.11    | (Atkinson and Arey,2003)   | 0.058 | Wu et al., 2017   |
| <b>C9</b>                           | n-alkanes                     | B9        | more_than_6 | VOCs  | P1 | 0.78 | 9.7     | (Atkinson and Arey,2003)   | 0.14  | Wu et al., 2017   |
| <b>C10</b>                          | n-alkanes                     | B10       | more_than_6 | VOCs  | P1 | 0.68 | 11      | (Atkinson and Arey,2003)   | 0.22  | Wu et al., 2017   |
| <b>C11</b>                          | n-alkanes                     | B11       | more_than_6 | VOCs  | P1 | 0.61 | 12.3    | (Atkinson and Arey,2003)   | 0.33  | Wu et al., 2017   |
| <b>C12</b>                          | n-alkanes                     | B12       | 6           | IVOCs | P1 | 0.55 | 13.2    | (Atkinson and Arey,2003)   | 0.02  | Chan et al., 2009 |
| <b>C13</b>                          | n-alkanes                     | B13       | 6           | IVOCs | P1 | 0.53 | 15.1    | (Atkinson and Arey,2003)   | 0.03  | Chan et al., 2009 |
| <b>C14</b>                          | n-alkanes                     | B14       | 6           | IVOCs | P1 | 0.51 | 17.9    | (Atkinson and Arey,2003)   | 0.05  | Chan et al., 2009 |
| <b>C15</b>                          | n-alkanes                     | B15       | 5           | IVOCs | P1 | 0.5  | 20.7    | (Atkinson and Arey,2003)   | 0.08  | Chan et al., 2009 |
| <b>C16</b>                          | n-alkanes                     | B16       | 5           | IVOCs | P1 | 0.45 | 23.2    | (Atkinson and Arey,2003)   | 0.12  | Chan et al., 2009 |
| <b>C17</b>                          | n-alkanes                     | B17       | 4           | IVOCs | P1 | 0.42 | 28.5    | (A. W. H. Chan et al,2009) | 0.2   | Chan et al., 2009 |
| <b>C18</b>                          | n-alkanes                     | B18       | 4           | IVOCs | P1 | 0.4  | 35.1    | (A. W. H. Chan et al,2009) | 0.3   | Chan et al., 2009 |
| <b>C19</b>                          | n-alkanes                     | B19       | 4           | IVOCs | P1 | 0.38 | 43.2    | (A. W. H. Chan et al,2009) | 0.42  | Chan et al., 2009 |
| <b>C20</b>                          | n-alkanes                     | B20       | 3           | IVOCs | P2 | 0.36 | 53.1    | (A. W. H. Chan et al,2009) | 0.56  | Chan et al., 2009 |
| <b>C21</b>                          | n-alkanes                     | B21       | 3           | IVOCs | P2 | 0.34 | 26.654  | AopWin v1.92               | 0.77  | Gentner, 2012     |
| <b>C22</b>                          | n-alkanes                     | B22       | 3           | IVOCs | P2 | 0.33 | 28.0671 | AopWin v1.92               | 0.96  | Gentner, 2012     |
| <b>C23</b>                          | n-alkanes                     | B23       | 2           | SVOCs | P2 |      | 29.4801 | AopWin v1.92               | 1.08  | Gentner, 2012     |
| <b>C24</b>                          | n-alkanes                     | B24       | 2           | SVOCs | P2 |      | 30.8932 | AopWin v1.92               | 1.14  | Gentner, 2012     |
| <b>C25</b>                          | n-alkanes                     | B25       | 2           | SVOCs | P2 |      | 32.3062 | AopWin v1.92               | 1.16  | Gentner, 2012     |
| <b>2-Furancarboxitrile</b>          | nitriles                      | B8        | more_than_6 | VOCs  | P3 |      |         |                            |       |                   |
| <b>Isoamyl cyanide</b>              | nitriles                      | B8        | more_than_6 | VOCs  | P3 |      |         |                            |       |                   |
| <b>Benzonitrile</b>                 | nitriles                      | B10       | more_than_6 | VOCs  | P4 |      | 0.3443  | AopWin                     |       |                   |
| <b>4-Methyl-2-oxopentanenitrile</b> | nitriles                      | B11       | more_than_6 | VOCs  | P6 |      |         |                            |       |                   |
| <b>Pyrazine</b>                     | nitrogen-containing compounds | B8_before | more_than_6 | VOCs  | P3 |      |         |                            |       |                   |
| <b>1H-Pyrazole, 1-methyl-</b>       | nitrogen-containing compounds | B8_before | more_than_6 | VOCs  | P2 |      |         |                            |       |                   |

---

|                                      |                                      |           |             |      |    |
|--------------------------------------|--------------------------------------|-----------|-------------|------|----|
|                                      | compounds                            |           |             |      |    |
| <b>Pyrrole</b>                       | nitrogen-con<br>taining<br>compounds | B8_before | more_than_6 | VOCs | P3 |
| <b>Pyridine</b>                      | nitrogen-con<br>taining<br>compounds | B8_before | more_than_6 | VOCs | P3 |
| <b>Pyrazine, methyl-</b>             | nitrogen-con<br>taining<br>compounds | B8        | more_than_6 | VOCs | P3 |
| <b>N,N-Dimethylacetamide</b>         | nitrogen-con<br>taining<br>compounds | B8        | more_than_6 | VOCs | P4 |
| <b>Pyrimidine, 4-methyl-</b>         | nitrogen-con<br>taining<br>compounds | B9        | more_than_6 | VOCs | P3 |
| <b>Imidazole, 1,4,5-trimethyl-</b>   | nitrogen-con<br>taining<br>compounds | B9        | more_than_6 | VOCs | P3 |
| <b>Pyrazine, methoxy-</b>            | nitrogen-con<br>taining<br>compounds | B9        | more_than_6 | VOCs | P3 |
| <b>Propanamide, N-ethyl-</b>         | nitrogen-con<br>taining<br>compounds | B9        | more_than_6 | VOCs | P3 |
| <b>4(1H)-Pyrimidinone, 6-methyl-</b> | nitrogen-con<br>taining<br>compounds | B9        | more_than_6 | VOCs | P5 |

---

|                                                                    |                                      |     |             |       |    |
|--------------------------------------------------------------------|--------------------------------------|-----|-------------|-------|----|
| <b>1H-Pyrazole, 3-methyl-</b>                                      | nitrogen-con<br>taining<br>compounds | B10 | more_than_6 | VOCs  | P4 |
| <b>4-Cyanocyclohexene</b>                                          | nitrogen-con<br>taining<br>compounds | B10 | more_than_6 | VOCs  | P4 |
| <b><math>\alpha</math>-Amino-<math>\gamma</math>-butyrolactone</b> | nitrogen-con<br>taining<br>compounds | B11 | more_than_6 | VOCs  | P5 |
| <b>Piperidine, 1-nitroso-</b>                                      | nitrogen-con<br>taining<br>compounds | B11 | more_than_6 | VOCs  | P7 |
| <b>Pyrrolidine, 1-acetyl-</b>                                      | nitrogen-con<br>taining<br>compounds | B11 | more_than_6 | VOCs  | P4 |
| <b>Benzenamine, 2-ethyl-6-methyl-</b>                              | nitrogen-con<br>taining<br>compounds | B11 | more_than_6 | VOCs  | P3 |
| <b>Formamide, N-cyclohexyl-</b>                                    | nitrogen-con<br>taining<br>compounds | B12 | 6           | IVOCs | P4 |
| <b>Caprolactam</b>                                                 | nitrogen-con<br>taining<br>compounds | B12 | 6           | IVOCs | P5 |
| <b>2-Butyn-1-one,<br/>1-(5-methyl-1H-1,2,3-triazol-4-yl<br/>)-</b> | nitrogen-con<br>taining<br>compounds | B12 | 6           | IVOCs | P3 |
| <b>1H-Pyrrole, 1-phenyl-</b>                                       | nitrogen-con                         | B13 | 6           | IVOCs | P3 |

|                                                                    |                                      |     |   |       |    |      |        |                                    |      |  |                   |
|--------------------------------------------------------------------|--------------------------------------|-----|---|-------|----|------|--------|------------------------------------|------|--|-------------------|
|                                                                    | taining<br>compounds                 |     |   |       |    |      |        |                                    |      |  |                   |
| <b>Acetamide, N-methyl-N-phenyl-</b>                               | nitrogen-con<br>taining<br>compounds | B13 | 6 | IVOCs | P4 |      |        |                                    |      |  |                   |
| <b>Hept-2-enoylamide, N-methyl-</b>                                | nitrogen-con<br>taining<br>compounds | B13 | 6 | IVOCs | P5 |      |        |                                    |      |  |                   |
| <b>Quinoline,<br/>1,2-dihydro-2,2,4-trimethyl-</b>                 | nitrogen-con<br>taining<br>compounds | B14 | 6 | IVOCs | P3 |      |        |                                    |      |  |                   |
| <b>Quinoline, 2,4-dimethyl-</b>                                    | nitrogen-con<br>taining<br>compounds | B14 | 6 | IVOCs | P4 |      |        |                                    |      |  |                   |
| <b>2-Benzothiazolamine, N-ethyl-</b>                               | nitrogen-con<br>taining<br>compounds | B17 | 4 | IVOCs | P5 |      |        |                                    |      |  |                   |
| <b>Diethyl Phthalate</b>                                           | PAEs                                 | B16 | 5 | IVOCs | P4 | 1.62 | 3.4658 | AopWin                             |      |  |                   |
| <b>1,2-Benzenedicarboxylic acid,<br/>bis(2-methylpropyl) ester</b> | PAEs                                 | B18 | 4 | IVOCs | P3 |      | 9.2602 | AopWin v1.92                       |      |  |                   |
| <b>Dibutyl phthalate</b>                                           | PAEs                                 | B19 | 4 | IVOCs | P3 | 1.25 | 9.277  | AopWin v1.92                       |      |  |                   |
| <b>Naphthalene</b>                                                 | PAHs                                 | B12 | 6 | IVOCs | P3 | 3.34 | 23     | (Atkinson and Arey,2003)           | 0.26 |  | Chan et al., 2009 |
| <b>Naphthalene, 2-methyl-</b>                                      | PAHs                                 | B13 | 6 | IVOCs | P3 | 3.06 | 48.6   | (Phouongphouang and Arey,<br>2002) | 0.38 |  | Chan et al., 2009 |
| <b>Naphthalene, 1-methyl-</b>                                      | PAHs                                 | B13 | 6 | IVOCs | P3 | 3.06 | 40.9   | (Phouongphouang and Arey,<br>2002) | 0.33 |  | Chan et al., 2009 |
| <b>Naphthalene-C2</b>                                              | PAHs                                 | B14 | 6 | IVOCs | P3 | 3.06 | 40.2   | (Phouongphouang and Arey,<br>2002) | 0.28 |  | Gentner, 2012     |

|                                                                             |           |     |             |       |    |      |         |                      |       |                                        |
|-----------------------------------------------------------------------------|-----------|-----|-------------|-------|----|------|---------|----------------------|-------|----------------------------------------|
| <b>Acenaphthylene</b>                                                       | PAHs      | B14 | 6           | IVOCs | P4 | 3.06 | 75.4921 | AopWin v1.92         | 0.03  | Fang et al., 2017                      |
| <b>Phenol</b>                                                               | phenols   | B10 | more_than_6 | VOCs  | P3 | 2.76 | 33.4673 | AopWin v1.92         | 0.38  | Fang et al., 2017                      |
| <b>Phenol, 2-methyl-</b>                                                    | phenols   | B11 | more_than_6 | VOCs  | P3 | 2.4  | 41.13   | AopWin v1.92         | 0.38  | Fang et al., 2017                      |
| <b>Phenol, 2-methoxy-</b>                                                   | phenols   | B11 | more_than_6 | VOCs  | P3 | 2.4  | 29.798  | AopWin v1.92         | 0.4   | Fang et al., 2017                      |
| <b>Creosol</b>                                                              | phenols   | B12 | 6           | IVOCs | P3 | 2.4  | 23.2235 |                      | 0.38  | Phenol, 3-methyl-<br>Fang et al., 2017 |
| <b>Phenol, 4-ethyl-2-methoxy-</b>                                           | phenols   | B13 | 6           | IVOCs | P3 | 2.4  | 23.2235 |                      | 0.38  | Phenol, 3-methyl-<br>Fang et al., 2017 |
| <b>Hydroquinone</b>                                                         | phenols   | B13 | 6           | IVOCs | P4 | 2.4  | 23.2235 | AopWin               | 0.38  | Phenol, 3-methyl-<br>Fang et al., 2017 |
| <b>Propofol</b>                                                             | phenols   | B13 | 6           | IVOCs | P3 | 2.4  | 23.2235 |                      | 0.38  | Phenol, 3-methyl-<br>Fang et al., 2017 |
| <b>Phenol, 2,6-dimethoxy-</b>                                               | phenols   | B13 | 6           | IVOCs | P4 | 2.4  | 23.2235 |                      | 0.38  | Phenol, 3-methyl-<br>Fang et al., 2017 |
| <b>Phenol, 2,6-bis(1,1-dimethylethyl)-4-(1-methylpropyl)-</b>               | phenols   | B16 | 5           | IVOCs | P2 | 1.18 | 18.2887 |                      | 0.38  | Phenol, 3-methyl-<br>Fang et al., 2017 |
| <b>Ethanone, 1-(7-hydroxy-5-methoxy-2,2-dimethyl-2H-1-benzopyran-8-yl)-</b> | phenols   | B19 | 4           | IVOCs | P3 | 1.18 | 18.2887 |                      | 0.38  | Phenol, 3-methyl-<br>Fang et al., 2017 |
| <b>D3</b>                                                                   | siloxanes | B8  | more_than_6 | VOCs  | P3 |      | 0.86    | (Alton et al., 2020) | 0.095 | McDonald et al., 2018                  |
| <b>D4</b>                                                                   | siloxanes | B10 | more_than_6 | VOCs  | P1 |      | 1.3     | (Alton et al., 2020) | 0.095 | McDonald et al., 2018                  |
| <b>L4</b>                                                                   | siloxanes | B11 | more_than_6 | VOCs  | P1 |      | 1.496   | AopWin v1.92         | 0.095 | McDonald et al., 2018                  |
| <b>D5</b>                                                                   | siloxanes | B12 | 6           | IVOCs | P1 |      | 2.1     | (Alton et al., 2020) | 0.095 | McDonald et al., 2018                  |



|                                     |                  |     |   |       |    |      |         |              |       |                          |
|-------------------------------------|------------------|-----|---|-------|----|------|---------|--------------|-------|--------------------------|
| <b>L5</b>                           | siloxanes        | B13 | 6 | IVOCs | P1 |      | 1.7952  | AopWin v1.92 | 0.095 |                          |
| <b>D6</b>                           | siloxanes        | B13 | 6 | IVOCs | P1 |      | 1.7952  | AopWin v1.92 | 0.095 | McDonald et al., 2018    |
| <b>D7</b>                           | siloxanes        | B15 | 5 | IVOCs | P1 |      | 1.7952  |              |       |                          |
| <b>D8</b>                           | siloxanes        | B17 | 4 | IVOCs | P1 |      | 1.7952  |              |       |                          |
| <b>Benzothiazole</b>                | sulfur compounds | B12 | 6 | IVOCs | P4 |      |         |              |       |                          |
| <b>Cyclohexane, isothiocyanato-</b> | sulfur compounds | B12 | 6 | IVOCs | P3 |      |         |              |       |                          |
| <b>B15_cyclic_UCM</b>               | UCMs             | B15 | 5 | IVOCs | P2 | 0.47 | 21.8828 |              | 0.613 | Lim and Ziemann, 2009    |
| <b>B15_aliphatic_UCM</b>            | UCMs             | B15 | 5 | IVOCs | P2 | 0.5  | 20.7    |              | 0.08  | C15<br>Chan et al., 2009 |
| <b>B16_cyclic_UCM</b>               | UCMs             | B16 | 5 | IVOCs | P3 | 0.47 | 21.8828 |              | 0.613 | Lim and Ziemann, 2009    |
| <b>B17_cyclic_UCM</b>               | UCMs             | B17 | 4 | IVOCs | P2 | 0.43 | 23.2958 |              | 0.613 | Lim and Ziemann, 2009    |
| <b>B18_cyclic_UCM</b>               | UCMs             | B18 | 4 | IVOCs | P2 | 0.43 | 23.2958 |              | 0.613 | Lim and Ziemann, 2009    |
| <b>B20_aliphatic_UCM</b>            | UCMs             | B20 | 3 | IVOCs | P1 | 0.36 | 53.1    |              | 0.56  | C20<br>Chan et al., 2009 |
| <b>B20_oxygenated_UCM</b>           | UCMs             | B20 | 3 | IVOCs | P2 |      |         |              |       |                          |
| <b>B20_cyclic_UCM</b>               | UCMs             | B20 | 3 | IVOCs | P3 | 0.43 | 23.2958 |              | 0.613 | Lim and Ziemann, 2009    |
| <b>B21_cyclic_UCM</b>               | UCMs             | B21 | 3 | IVOCs | P3 | 0.43 | 23.2958 |              | 0.613 | Lim and Ziemann, 2009    |

51

52

53 **Table S4.** Emission factors ( $\mu\text{g g}^{-1}$ ) of selected compounds in this study and comparison with other  
 54 incense burning studies.

| Rank of<br>EF | Compound                             | This study      | Lee et al., 2004<br>(Lee and Wang, 2004) | Yang et al., 2007<br>(Yang et al., 2007) | Manoukian et al., 2016<br>(Manoukian et al., 2016) |
|---------------|--------------------------------------|-----------------|------------------------------------------|------------------------------------------|----------------------------------------------------|
| 1             | Toluene                              | 70.8 $\pm$ 35.7 | 150.7 $\pm$ 34.3                         | 108 ~ 661                                | 366 ~ 1194                                         |
| 2             | Benzene                              | 59.6 $\pm$ 43.1 | 491.1 $\pm$ 50.6                         | 188 ~ 1796                               | 654 ~ 1826                                         |
| 3             | Furfural                             | 28.8 $\pm$ 10.4 |                                          |                                          |                                                    |
| 4             | Phenol                               | 24.0 $\pm$ 13.3 |                                          |                                          |                                                    |
| 5             | Styrene                              | 21.9 $\pm$ 11.1 | 53.3 $\pm$ 22.0                          | 13 ~ 73                                  |                                                    |
| 6             | Propanoic acid, 2-oxo-, methyl ester | 21.0 $\pm$ 9.5  |                                          |                                          |                                                    |
| 7             | 2-Butanone, 3-methyl-                | 18.7 $\pm$ 14.0 |                                          |                                          |                                                    |
| 8             | Ethylbenzene                         | 15.5 $\pm$ 8.9  | 9.9 $\pm$ 2.0                            | 2 ~ 165                                  |                                                    |
| 9             | 2-Propanone, 1-hydroxy-              | 13.9 $\pm$ 7.3  |                                          |                                          |                                                    |
| 10            | Benzyl alcohol                       | 13.4 $\pm$ 19.2 |                                          |                                          |                                                    |
| 11            | <i>p</i> -Xylene                     | 12.1 $\pm$ 5.6  | 27.5 $\pm$ 6.7                           | 3 ~ 115                                  |                                                    |
| 18            | Limonene                             | 9.4 $\pm$ 8.5   |                                          |                                          |                                                    |
| 23            | Phenylethyne                         | 6.8 $\pm$ 3.8   |                                          |                                          |                                                    |
| 24            | <i>o</i> -Xylene                     | 6.7 $\pm$ 4.0   | 6.1 $\pm$ 1.4                            | 1 ~ 133                                  |                                                    |
| 27            | 2-Furanmethanol                      | 5.9 $\pm$ 2.1   |                                          |                                          |                                                    |
| 36            | 2-Butenal, 2-methyl-                 | 4.9 $\pm$ 3.6   |                                          |                                          |                                                    |
| 37            | Diethyl Phthalate                    | 4.7 $\pm$ 4.0   |                                          |                                          |                                                    |
| 39            | Benzaldehyde                         | 4.4 $\pm$ 2.8   |                                          |                                          |                                                    |
| 40            | Aromandendrene                       | 4.3             |                                          |                                          |                                                    |
| 62            | Naphthalene                          | 3.0 $\pm$ 1.5   |                                          |                                          |                                                    |
| 65            | Furan, 2,5-dimethyl-                 | 2.9 $\pm$ 0.9   |                                          |                                          |                                                    |
| 311           | Acenaphthylene                       | 0.1 $\pm$ 0.1   |                                          |                                          |                                                    |

---

**315**

Dibenzofuran

 $0.1 \pm 0.04$ 

---

55

56 **Figures**

57 **Figure S1.** Incenses used in this study including 4 common incense sticks, 2 Thailand incense sticks,  
58 1 mosquito coil, and 2 incense coils.

59 **Figure S2.** Typical chromatogram of incense burning emissions. Blobs identified are colored by  
60 chemical classes.

61 **Figure S3.** Constitutes of emission factor (EF), ozone formation potential (OFP), and secondary  
62 organic aerosol (SOA) estimation.

63 **Figure S4.** Top 10 chemicals of the incense burning emission factor (EF), ozone formation potential  
64 (OFP), and secondary organic aerosol (SOA) estimation. The unit of EF, OFP, and SOA is  $\mu\text{g g}^{-1}$ .  
65 Compounds are colored by chemical class.

66 **Figure S5.** Volatility-polarity distribution of emission factor (EF), ozone formation potential (OFP),  
67 and secondary organic aerosol (SOA) estimation. VOCs (blue color on the  $x$ -axis), IVOCs (orange  
68 color on the  $x$ -axis), and SVOCs (red color on the  $x$ -axis) are displayed in volatility bins (a decrease  
69 of volatility from B8 to B31) along with their polarity (an increase from P1 to P8 in the  $y$ -axis). The  
70 EF unit is  $\mu\text{g g}^{-1}$ .

71 **Figure S6.** Emission factor (EF), ozone formation potential (OFP), and secondary organic aerosol  
72 (SOA) in both VOC and IVOC ranges. SVOCs are only  $n$ -alkane compounds.

73 **Figure S7.** Pixel-based partial least squares-discriminant analysis (PLS-DA) of incense burning  
74 using different forms of incense. The pre-grouping variable is the incense shape.

75 **Figure S8.** Pixel-based partial least squares-discriminant analysis (PLS-DA) of incense burning  
76 made in different materials. The pre-grouping variable is the incense material.

77 **Figure S9.** Compositions of EFs, OFP, and SOA estimation of different types of incense: incense coil,  
78 incense stick, mosquito coil, and Thailand incense stick.

79 **Figure S10.** Compositions of EFs, OFP, and SOA estimation of different types of incense: aromatic  
80 coil, aromatic stick, mosquito coil, sandalwood stick, and smokeless sandalwood stick.

81 **Figure S11.** Compositions of EFs of different types of incense: incense coil, incense stick, mosquito  
82 coil, and Thailand incense stick.

83 **Figure S12.** Compositions of EFs of different types of incense: aromatic coil, aromatic stick,

84 mosquito coil, sandalwood stick, and smokeless sandalwood stick.

85 **Figure S13.** Relationships of 2-hydroxy-2-cyclopenten-1-one (a), 2-furanmethanol (b),  
86 3-ethyl-2-pentanone (c), furfural (d) emission factors (EFs) among different incense types.

87 **Figure S14.** The formation mechanism of furfural from xylose and D-xylopyranose.

88 **Figure S15.** Chemicals with high arctic contamination potential (ACP) assessed by pixel-based  
89 approaches.

90

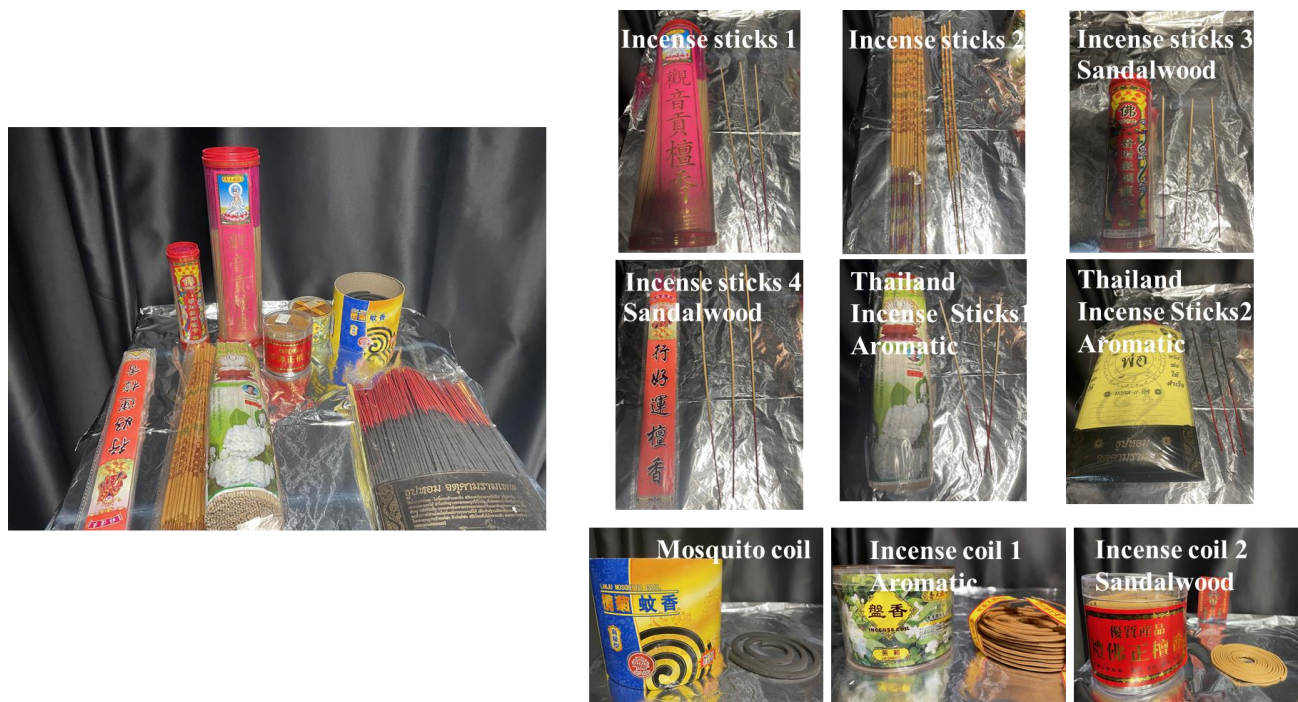

91  
 92 **Figure S1.** Incenses used in this study including 4 common incense sticks, 2 Thailand incense sticks,  
 93 1 mosquito coil, and 2 incense coils.

94

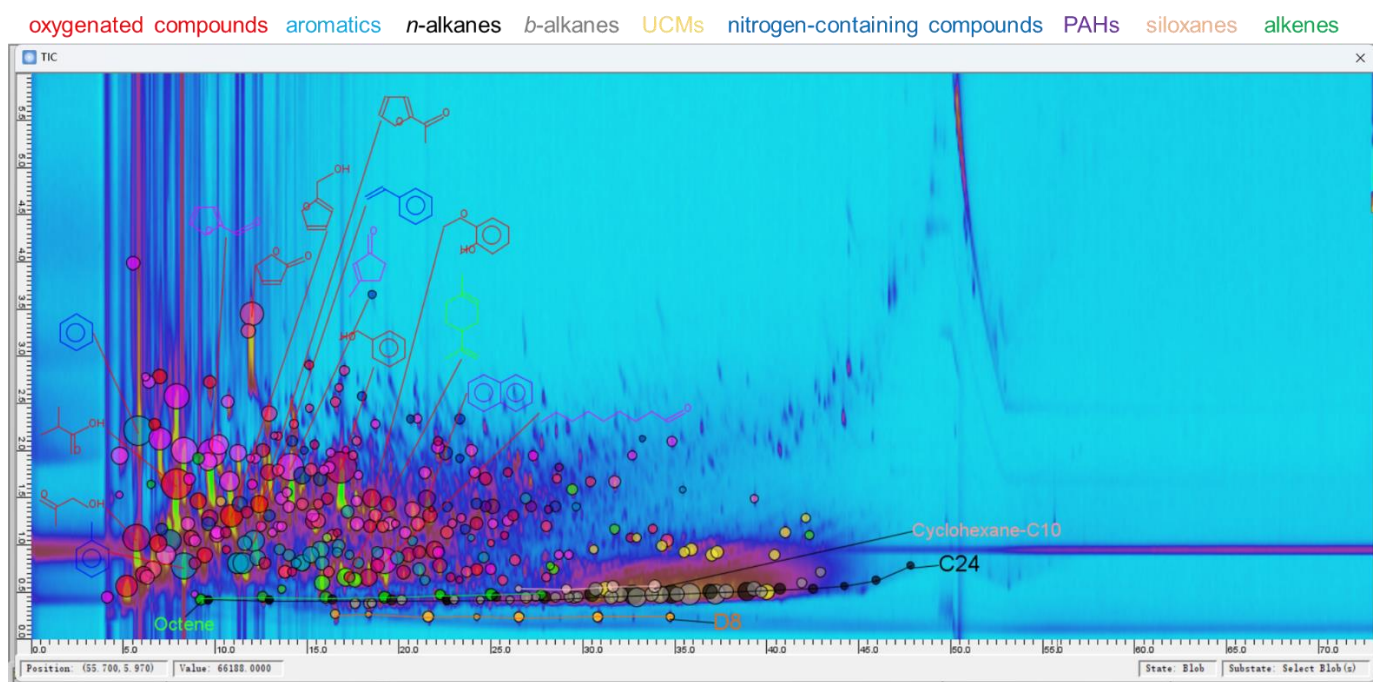

95 oxygenated compounds: ketones alcohols acids aldehydes esters phenols furans ethers  
 96 **Figure S2.** Typical chromatogram of incense burning emissions. Blobs identified are colored by  
 97 chemical classes.

98

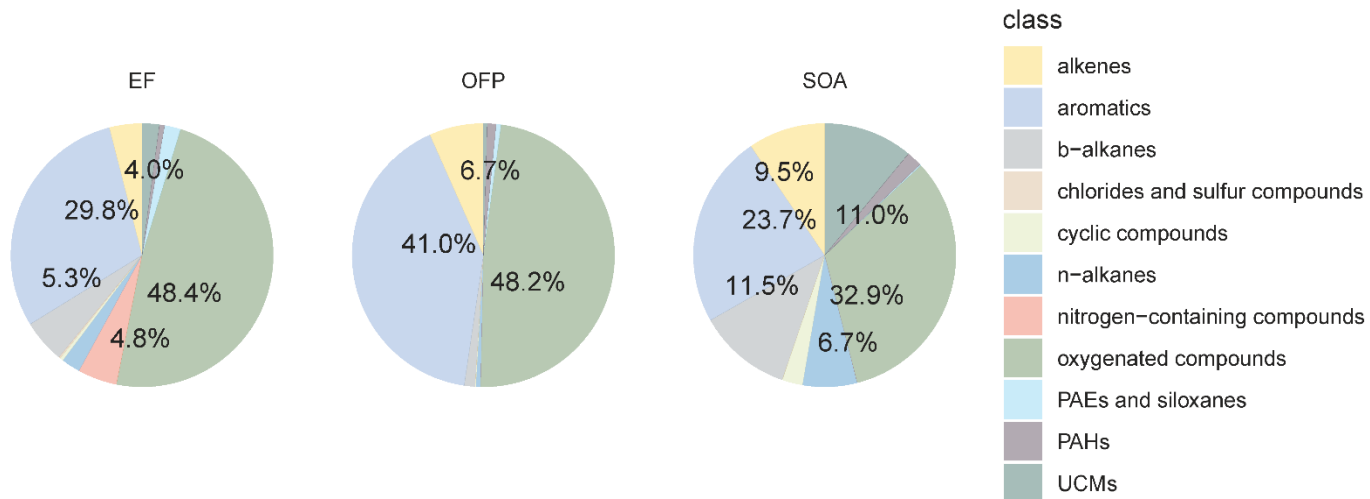

99

100 **Figure S3.** Constitutes of emission factor (EF), ozone formation potential (OFP), and secondary  
 101 organic aerosol (SOA) estimation.

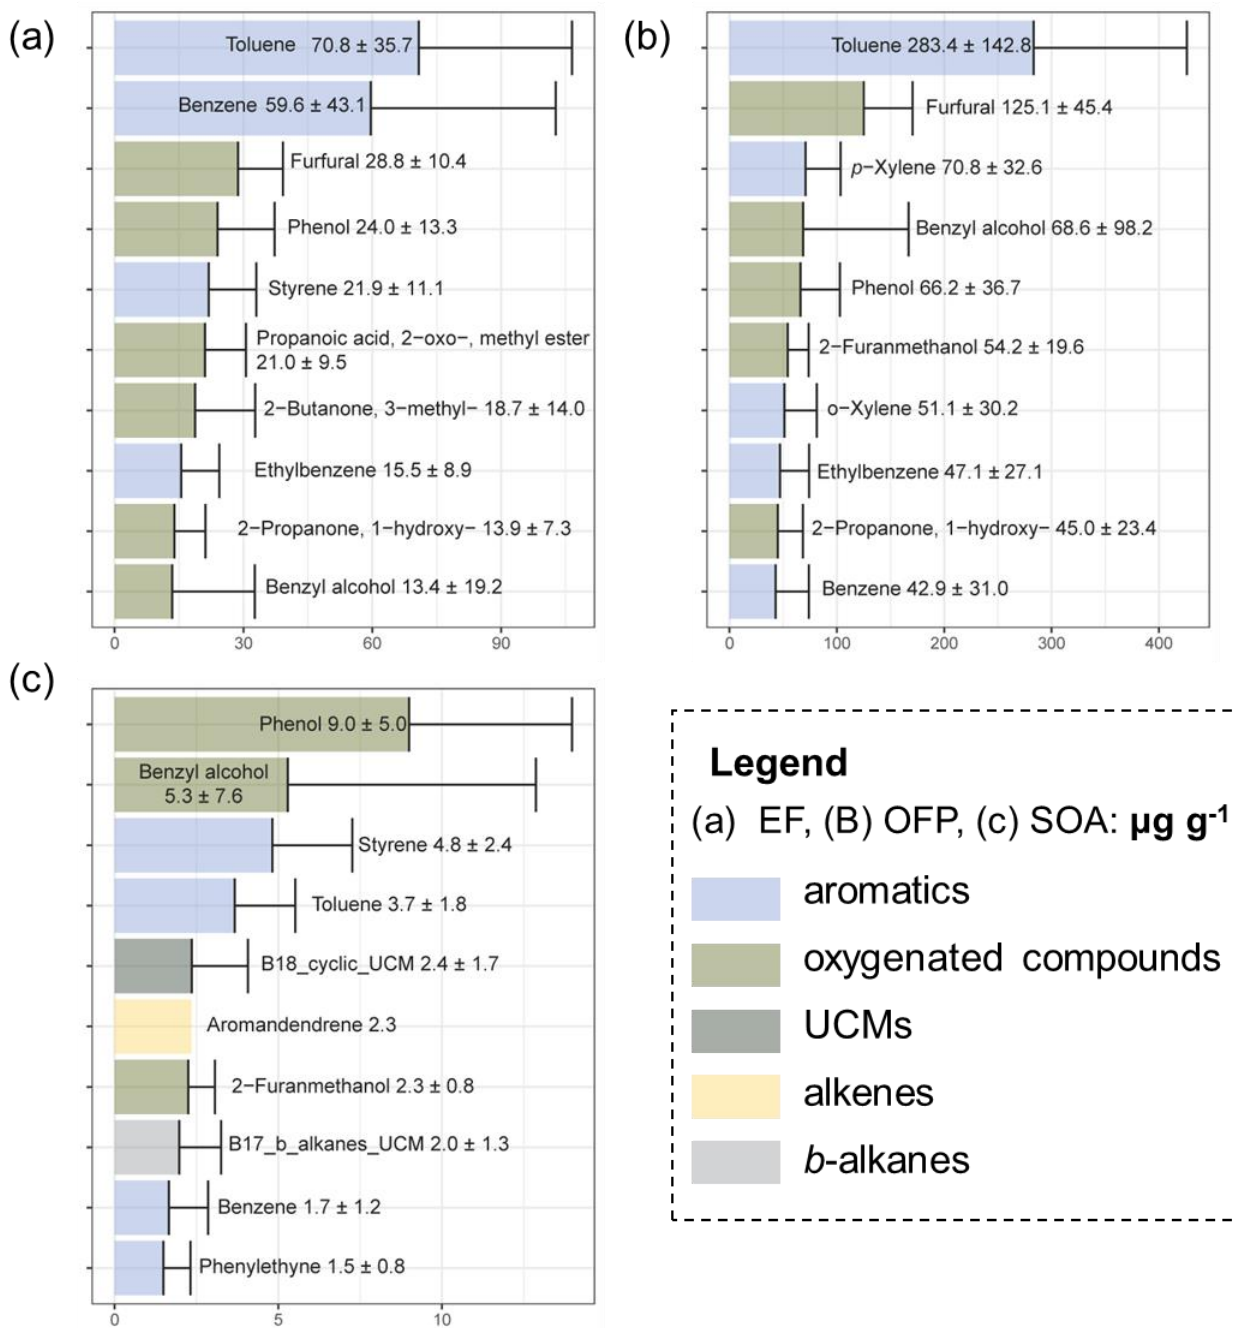

102

103 **Figure S4.** Top 10 chemicals of the incense burning emission factor (EF), ozone formation potential

104 (OFP), and secondary organic aerosol (SOA) estimation. The unit of EF, OFP, and SOA is  $\mu\text{g g}^{-1}$ .

105 Compounds are colored by chemical class.

106



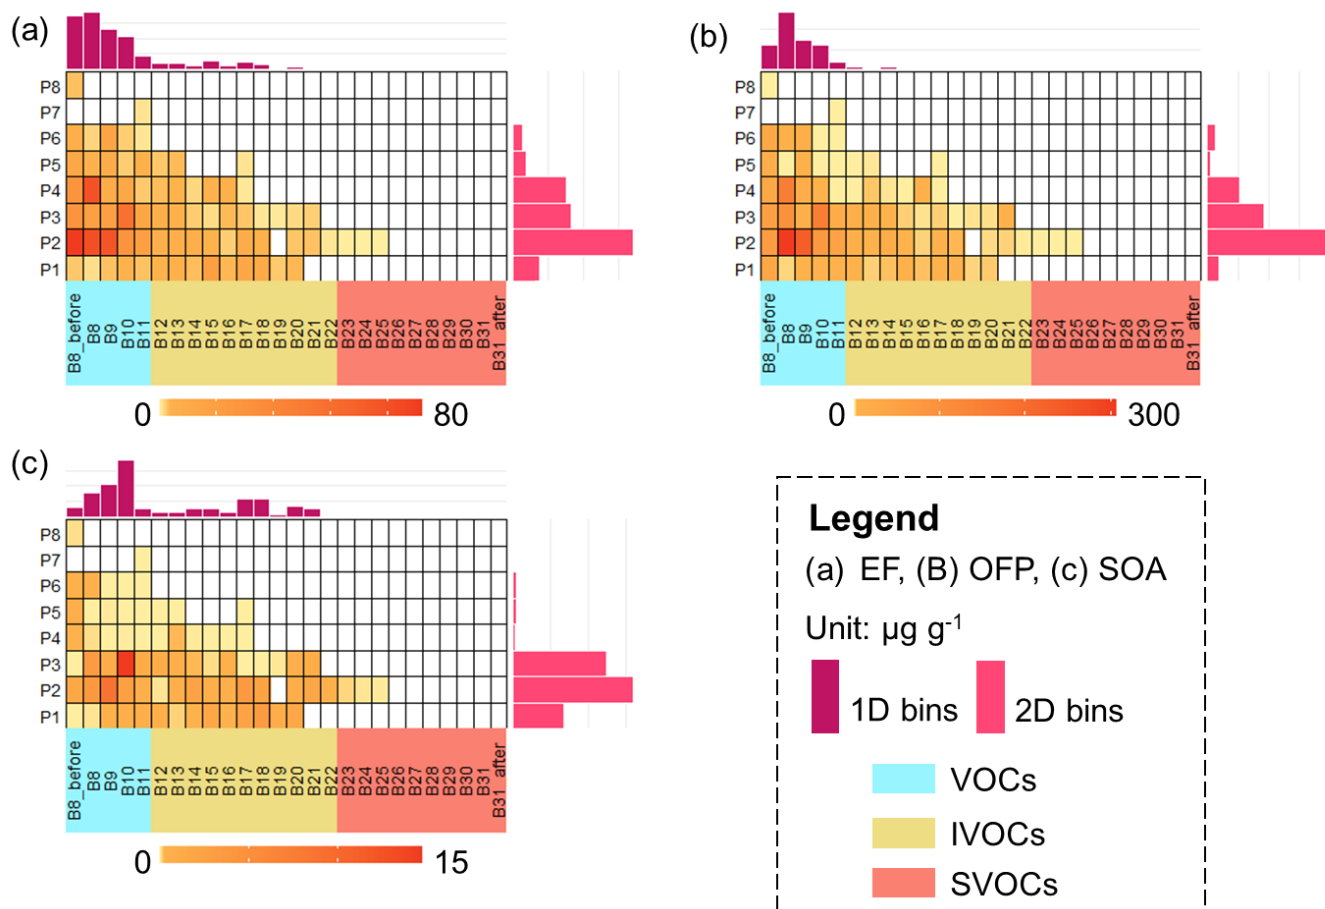

107

108 **Figure S5.** Volatility-polarity distribution of emission factor (EF), ozone formation potential (OFP),

109 and secondary organic aerosol (SOA) estimation. VOCs (blue color on the  $x$ -axis), IVOCs (orange

110 color on the  $x$ -axis), and SVOCs (red color on the  $x$ -axis) are displayed in volatility bins (a decrease

111 of volatility from B8 to B31) along with their polarity (an increase from P1 to P8 in the  $y$ -axis). The

112 EF unit is  $\mu\text{g g}^{-1}$ .

113

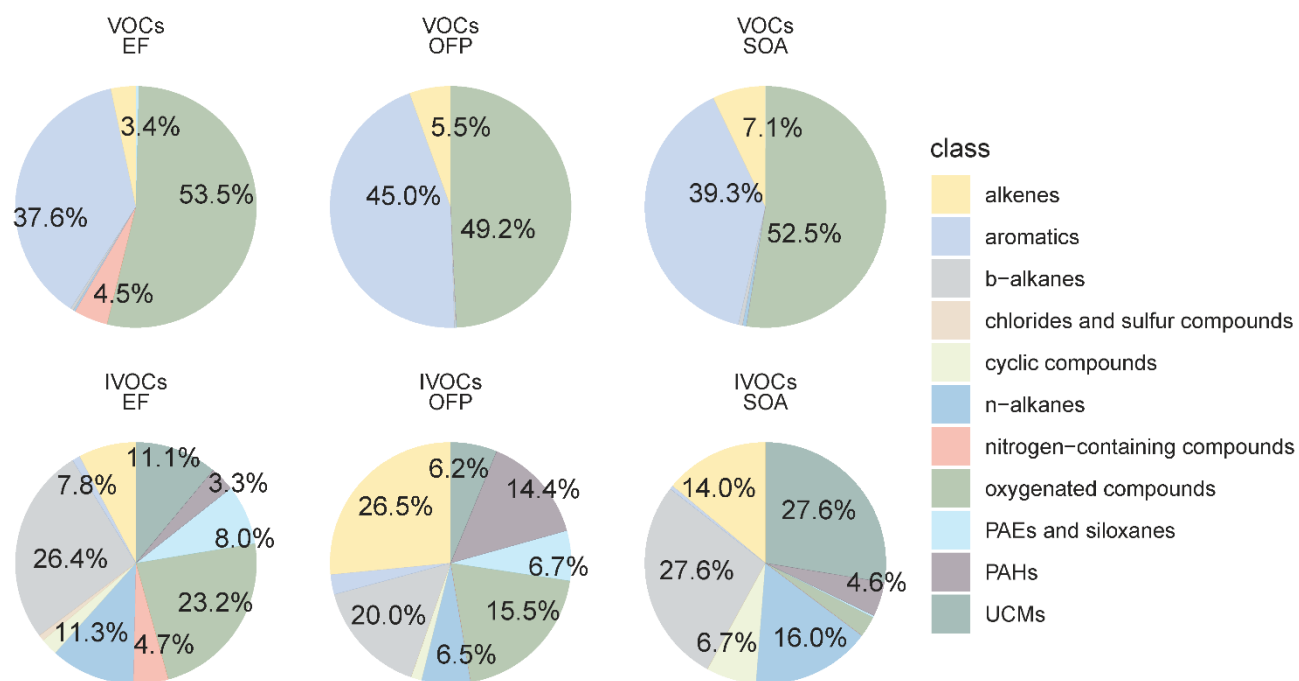

114

115 **Figure S6.** Emission factor (EF), ozone formation potential (OFP), and secondary organic aerosol

116 (SOA) in both VOC and IVOC ranges. SVOCs are only *n*-alkane compounds.

117

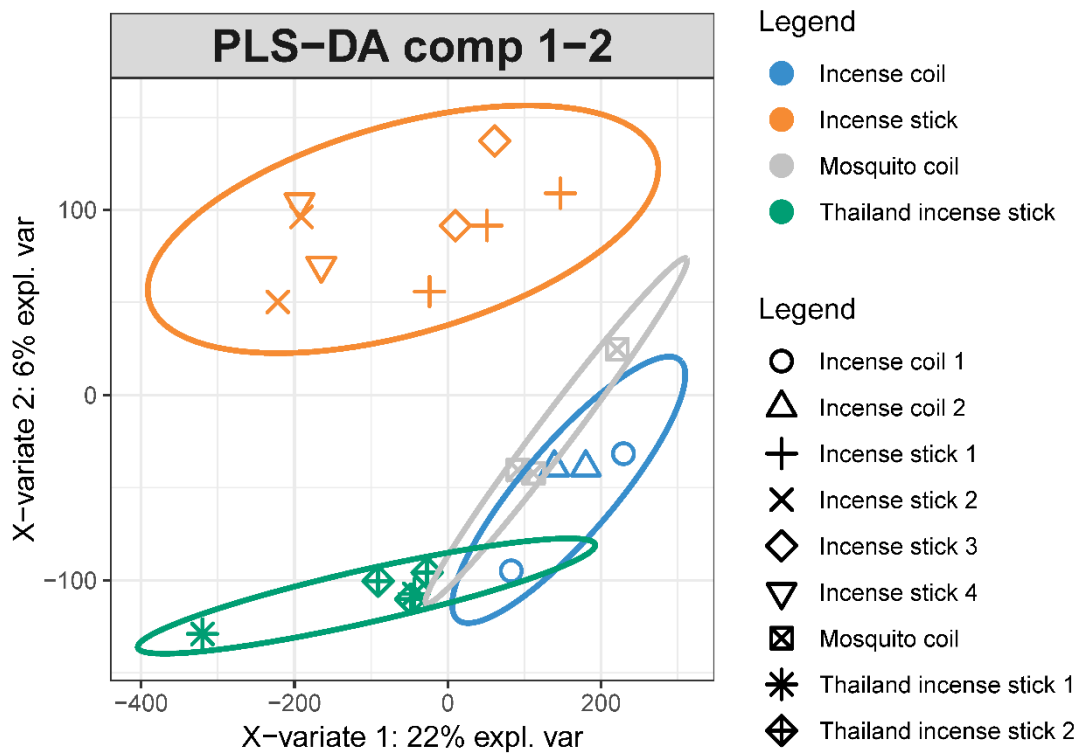

118

119 **Figure S7.** Pixel-based partial least squares-discriminant analysis (PLS-DA) of incense burning  
 120 using different forms of incense. The pre-grouping variable is the incense shape.

121

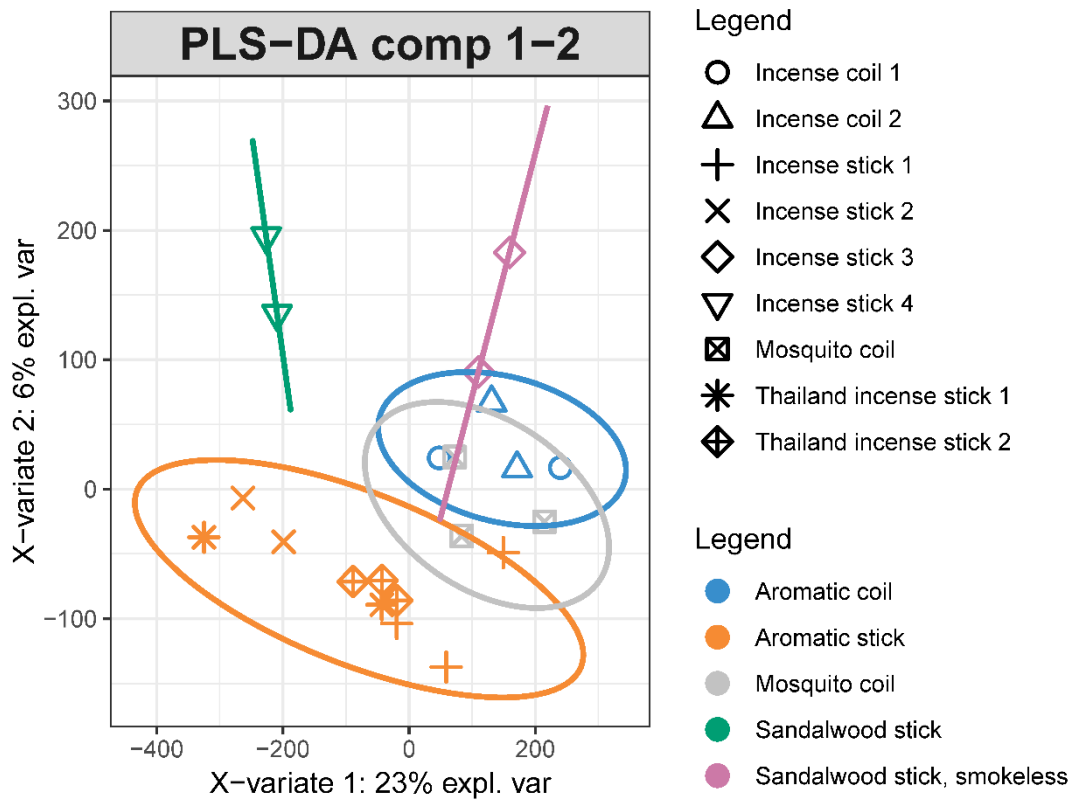

122

123 **Figure S8.** Pixel-based partial least squares-discriminant analysis (PLS-DA) of incense burning

124 made in different materials. The pre-grouping variable is the incense material.

125

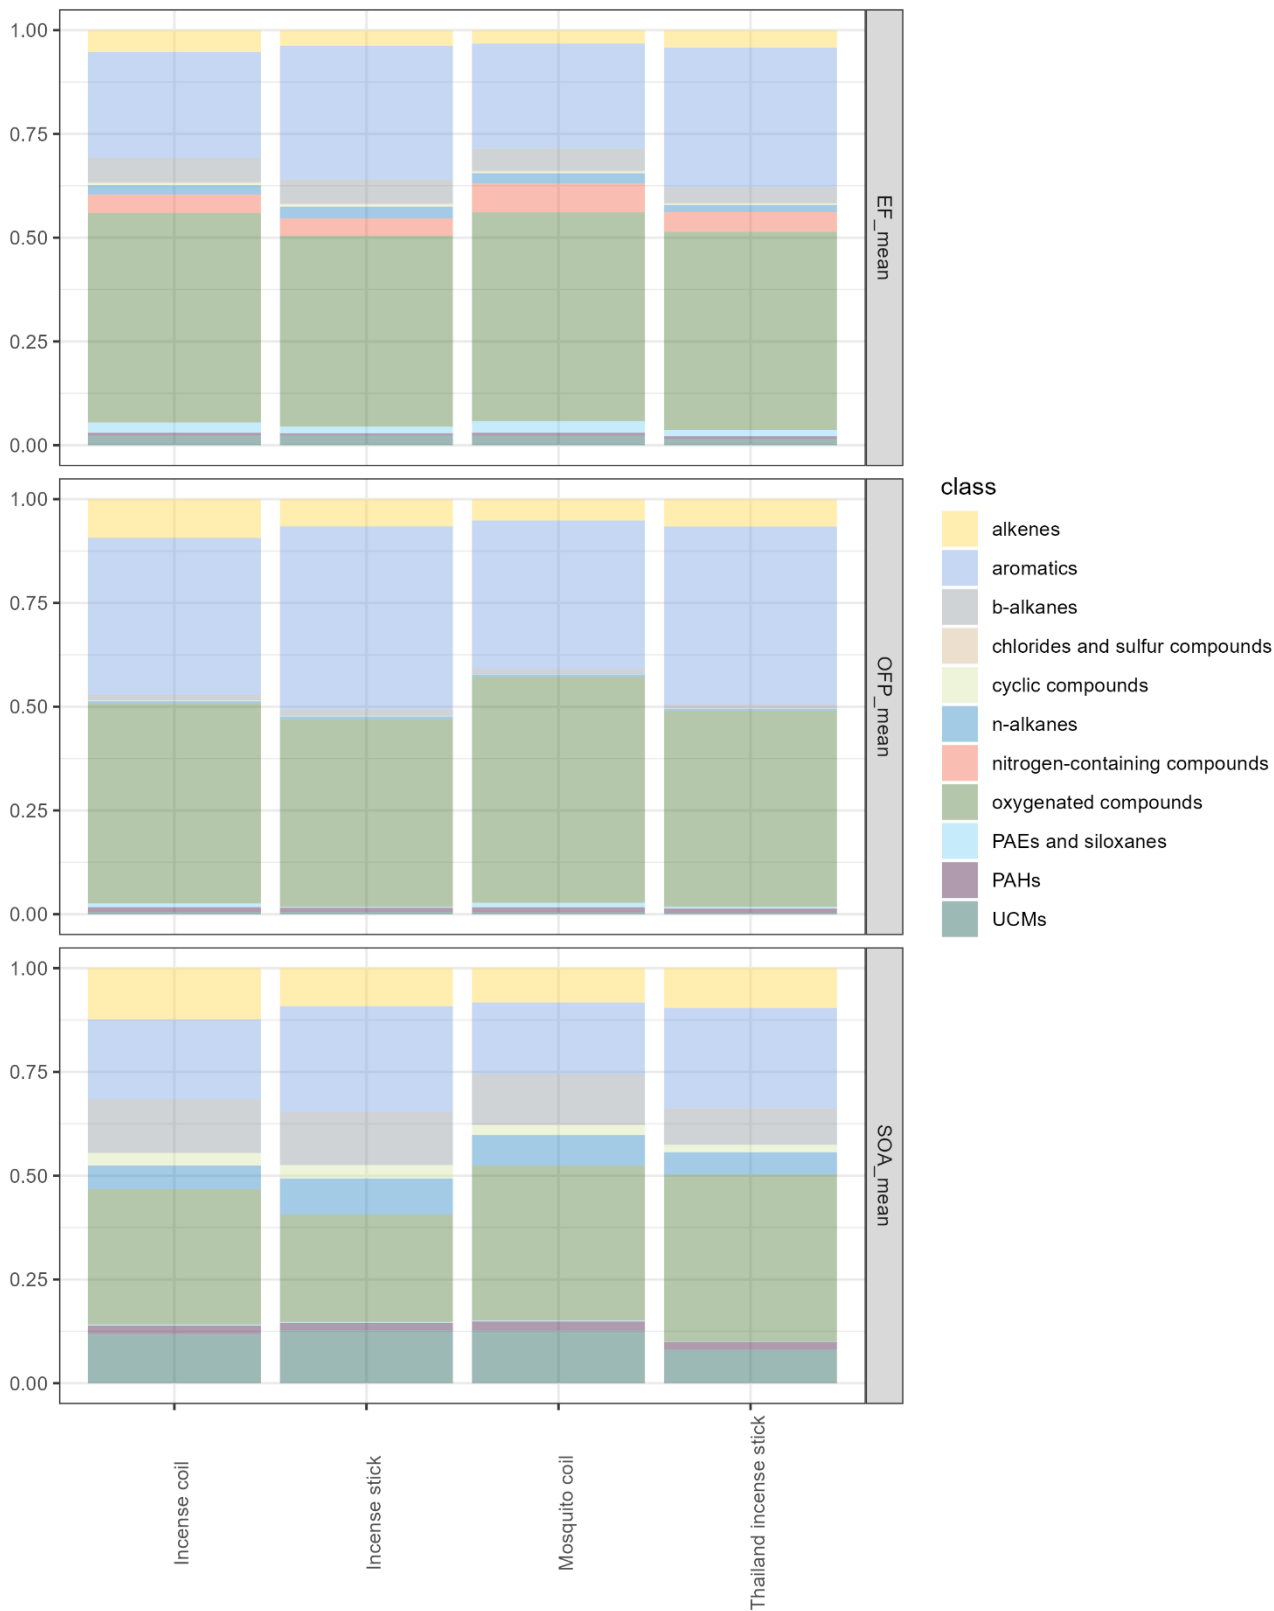

126

127 **Figure S9.** Compositions of EFs, OFP, and SOA estimation of different types of incense: incense coil,

128 incense stick, mosquito coil, and Thailand incense stick.

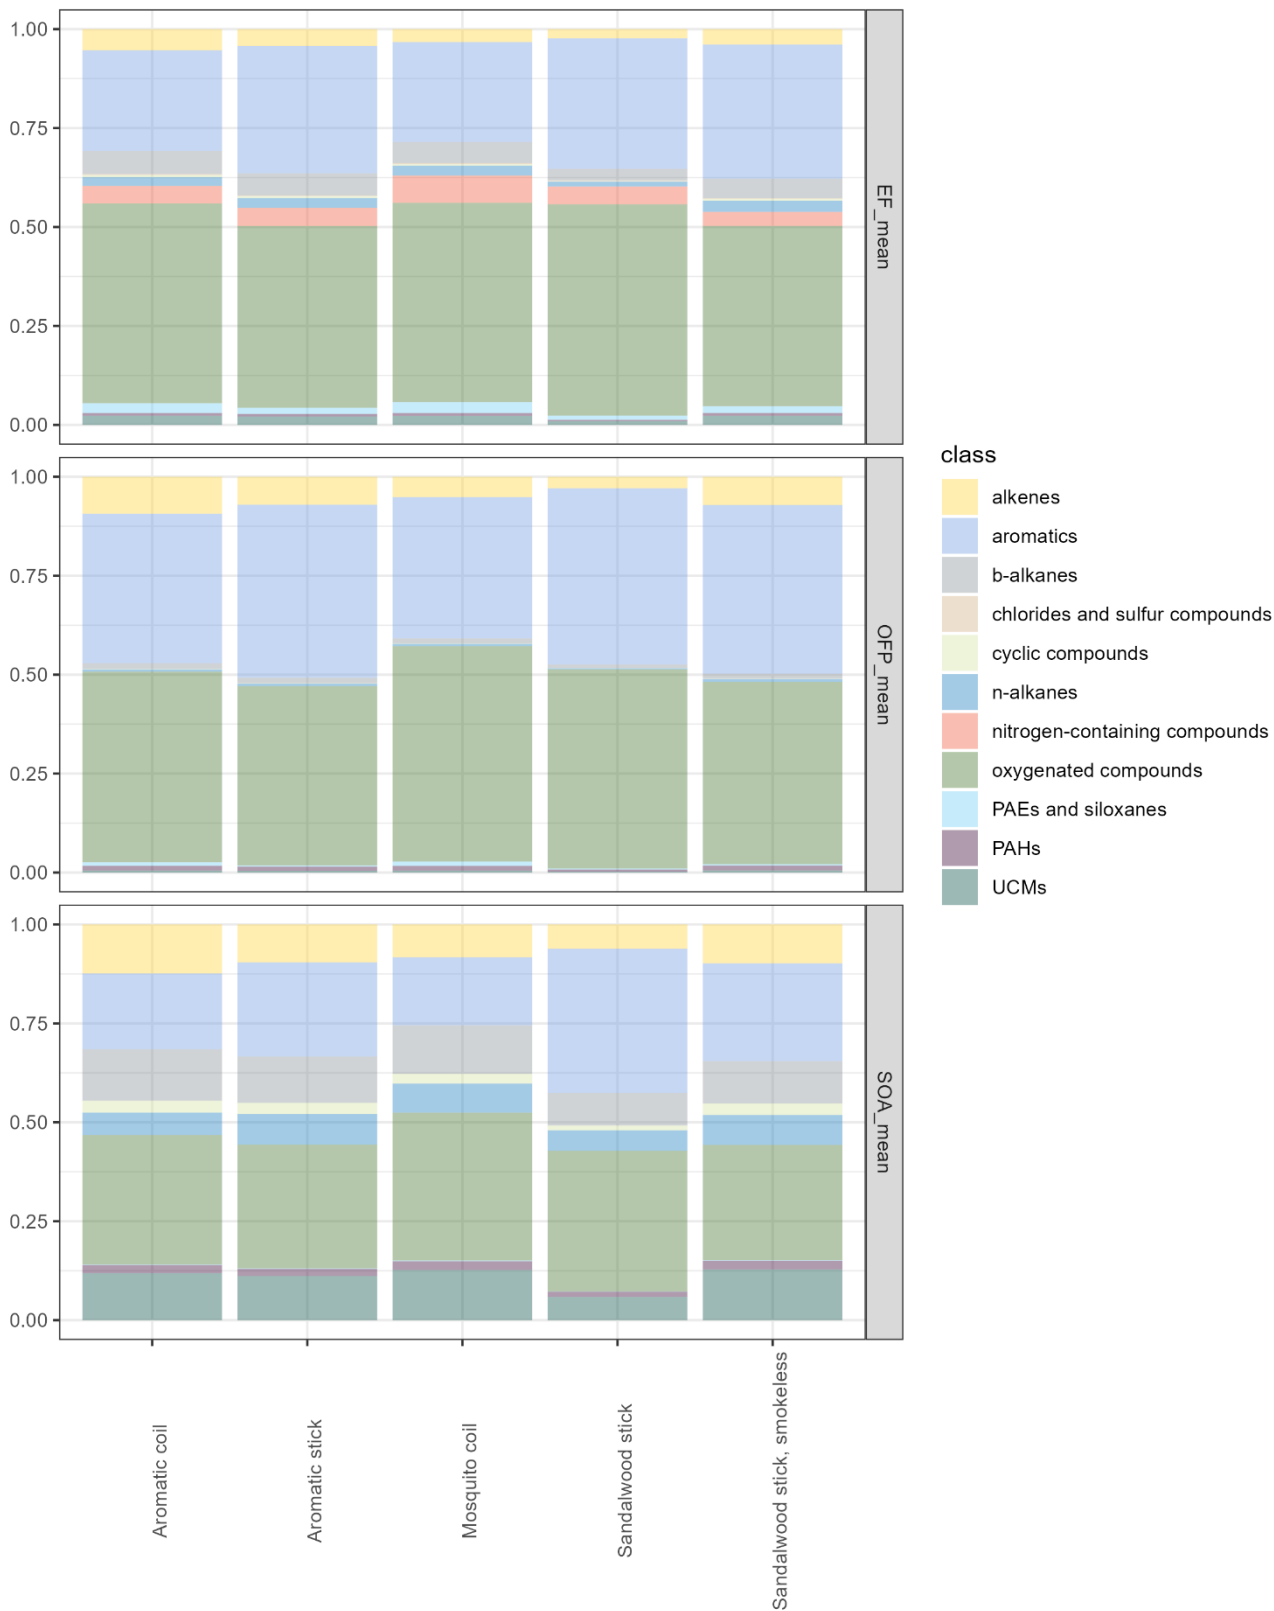

129

130 **Figure S10.** Compositions of EFs, OFP, and SOA estimation of different types of incense: aromatic

131 coil, aromatic stick, mosquito coil, sandalwood stick, and smokeless sandalwood stick.

132

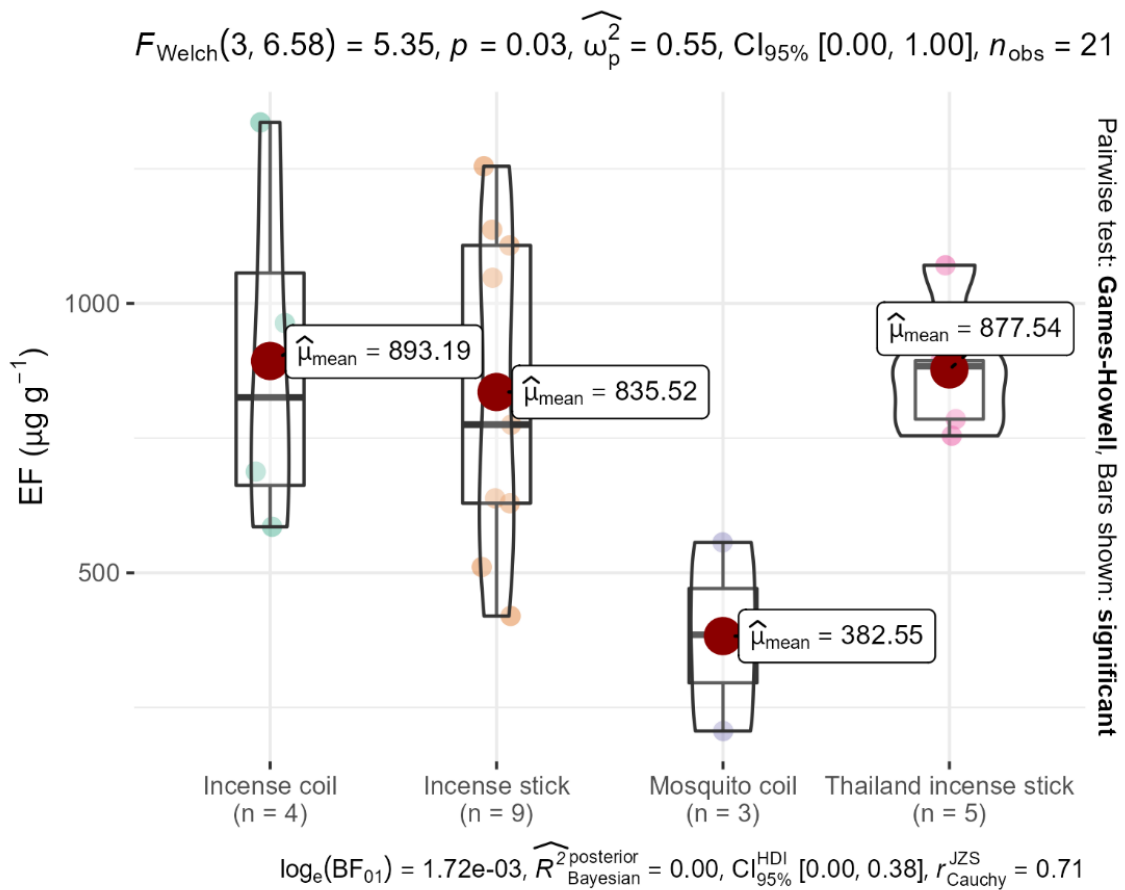

133

134 **Figure S11.** Compositions of EFs of different types of incense: incense coil, incense stick, mosquito

135 coil, and Thailand incense stick.

136

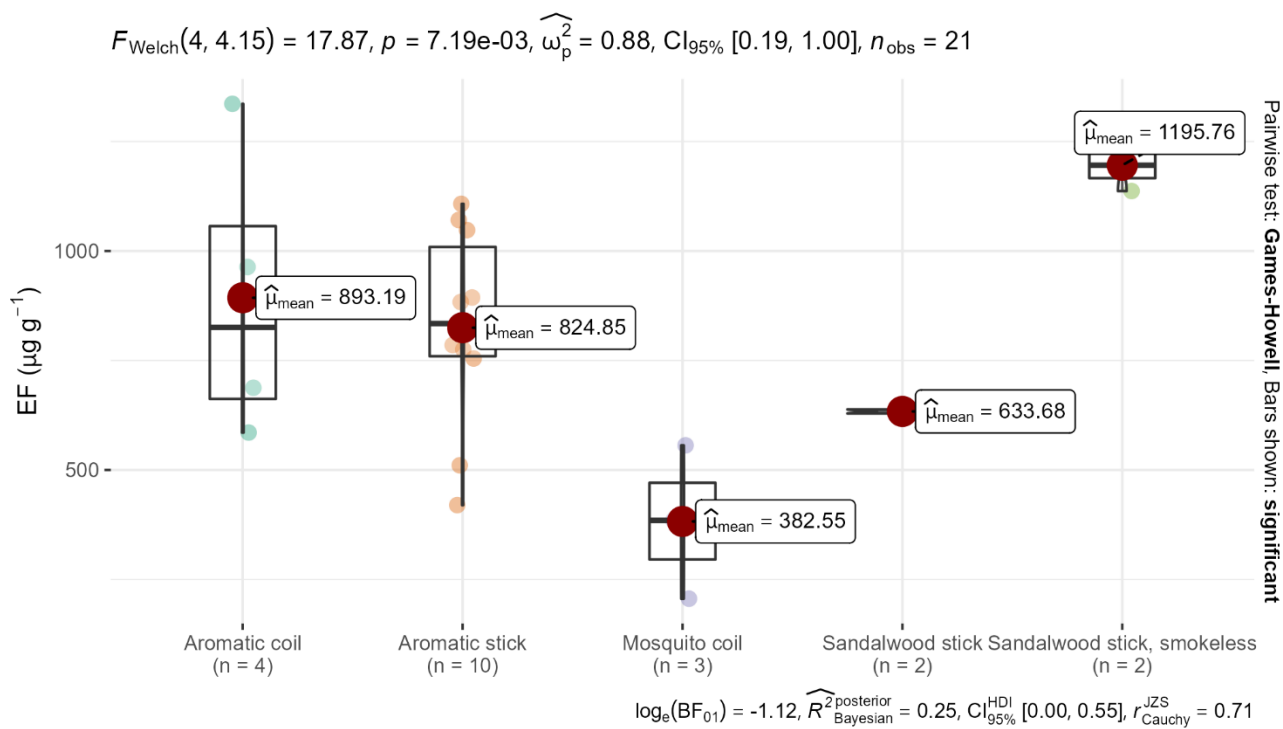

137

138 **Figure S12.** Compositions of EFs of different types of incense: aromatic coil, aromatic stick,

139 mosquito coil, sandalwood stick, and smokeless sandalwood stick.

140



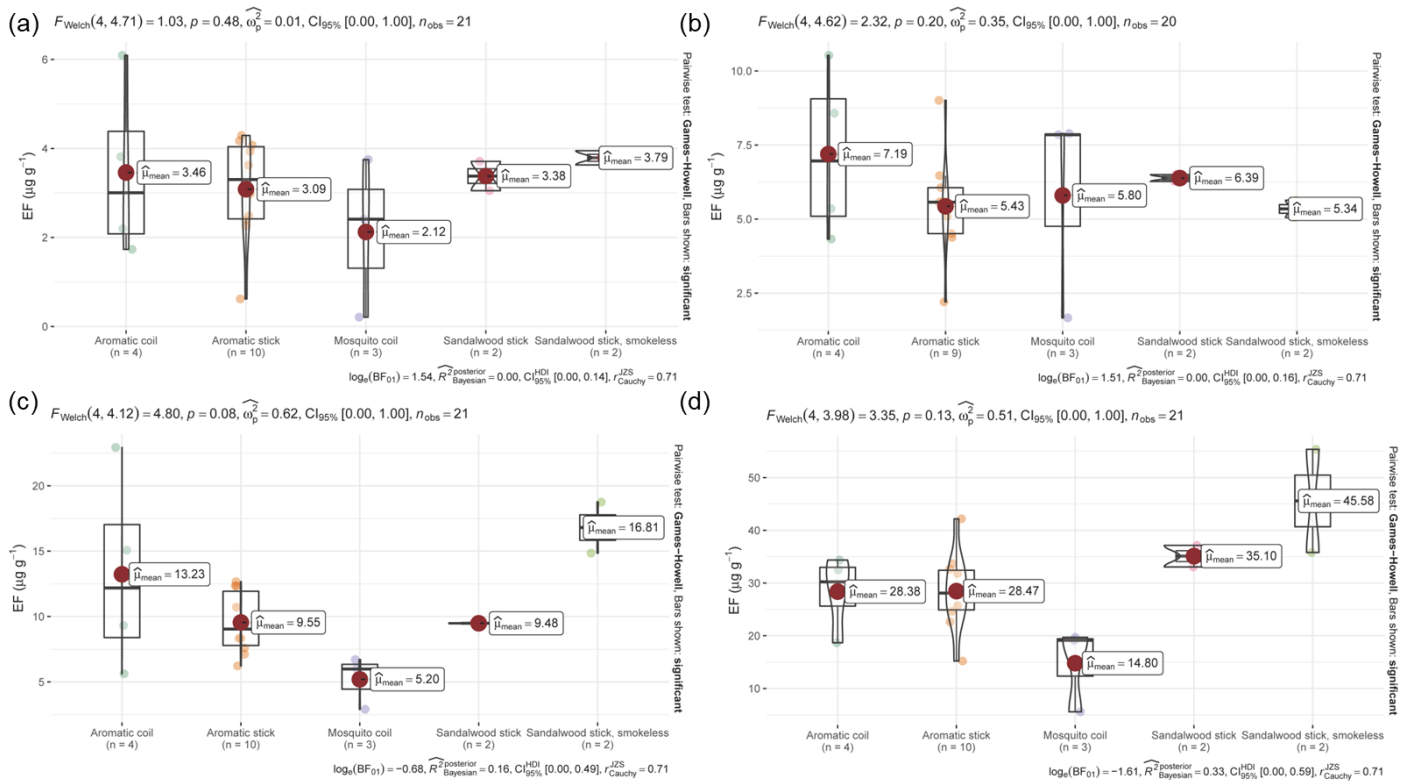

(a) 2-Cyclopenten-1-one, 2-hydroxy-, (b) 2-Furanmethanol, (c) 2-Pentanone, 3-ethyl-, (d) Furfural

141

142 **Figure S13.** Relationships of 2-hydroxy-2-cyclopenten-1-one (a), 2-furanmethanol (b),

143 3-ethyl-2-pentanone (c), furfural (d) emission factors (EFs) among different incense types.

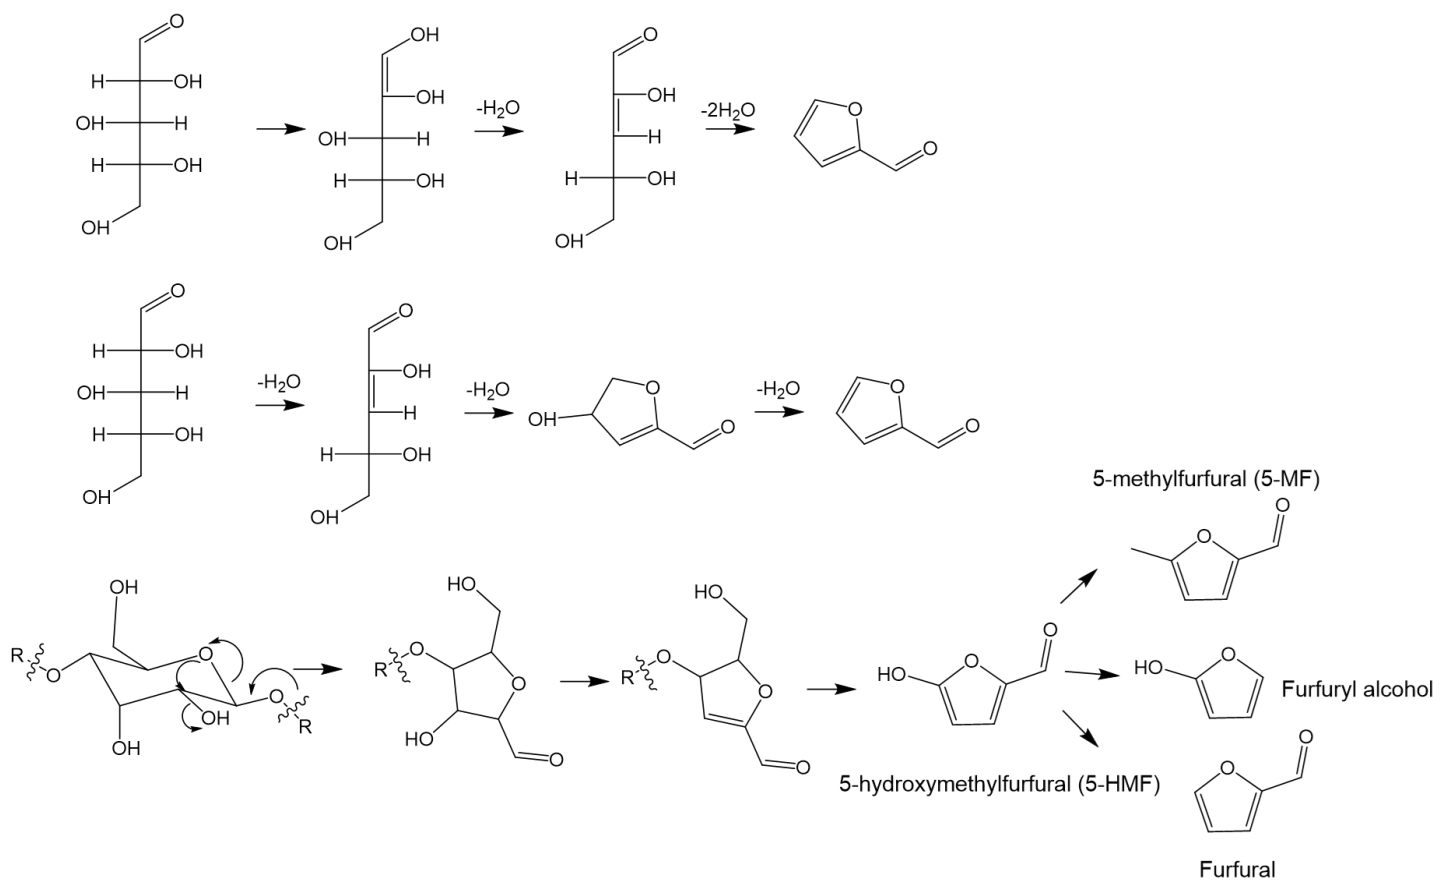

144

145 **Figure S14.** The formation mechanism of furfural from xylose and D-xylopyranose (Ahmad et al.,

146 1995; Bonner and Roth1, 1959; Nimlos et al., 2006).

147

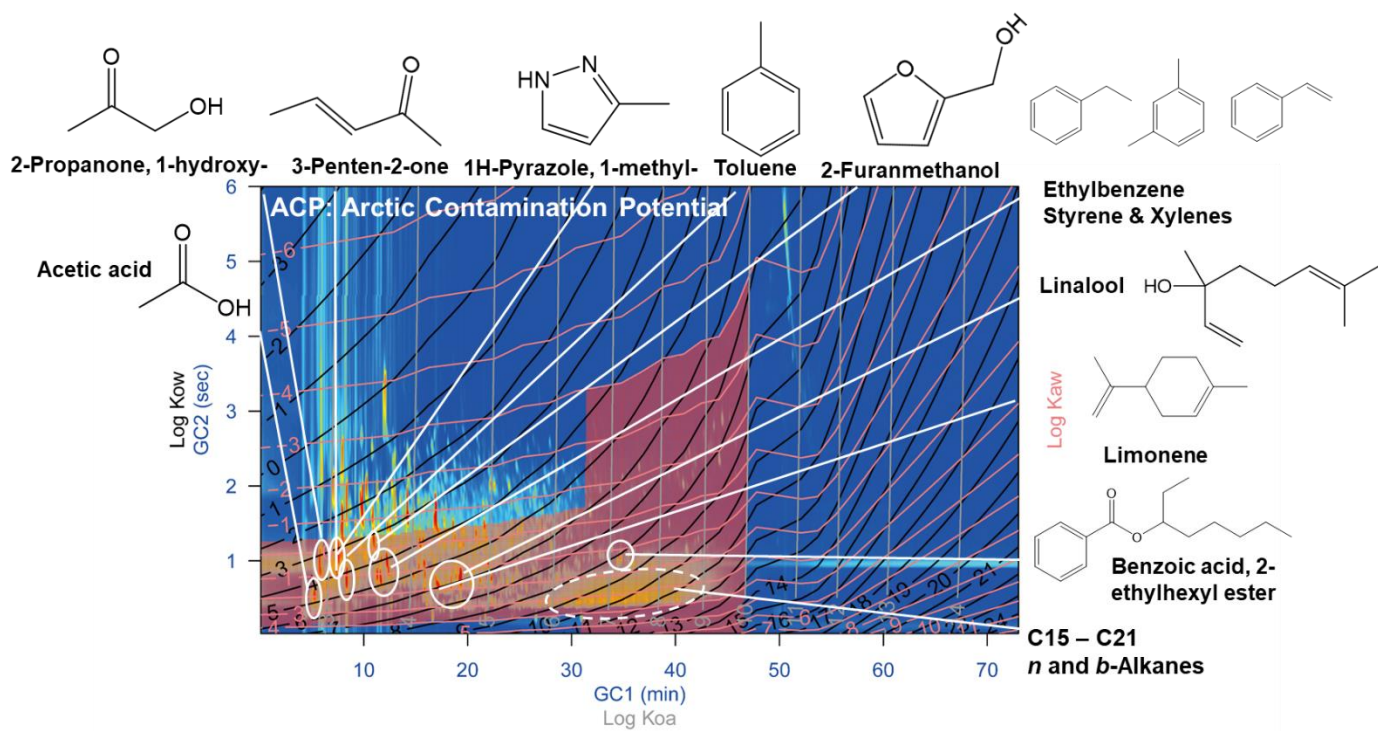

148

149 **Figure S15.** Chemicals with high arctic contamination potential (ACP) assessed by pixel-based  
 150 approaches.

151

152 **References**

- 153 Ahmad, T., Kenne, L., Olsson, K., and Theander, O.: The formation of 2-furaldehyde and formic acid  
154 from pentoses in slightly acidic deuterium oxide studied by <sup>1</sup>H NMR spectroscopy, *Carbohydr Res*,  
155 276, 309–320, [https://doi.org/10.1016/0008-6215\(95\)00176-T](https://doi.org/10.1016/0008-6215(95)00176-T), 1995.
- 156 Algrim, L. B. and Ziemann, P. J.: Effect of the Keto Group on Yields and Composition of Organic  
157 Aerosol Formed from OH Radical-Initiated Reactions of Ketones in the Presence of NO<sub>x</sub>, *Journal of*  
158 *Physical Chemistry A*, 120, 6978–6989, <https://doi.org/10.1021/acs.jpca.6b05839>, 2016.
- 159 Algrim, L. B. and Ziemann, P. J.: Effect of the Hydroxyl Group on Yields and Composition of Organic  
160 Aerosol Formed from OH Radical-Initiated Reactions of Alcohols in the Presence of NO<sub>x</sub>, *ACS Earth*  
161 *Space Chem*, 3, 413–423, <https://doi.org/10.1021/acsearthspacechem.9b00015>, 2019.
- 162 Bonner, W. A. and Roth, M. R.: The Conversion of d-Xylose-1-C<sup>14</sup> into 2-Furaldehyde- $\alpha$ -C<sup>14</sup>, *J Am*  
163 *Chem Soc*, 81, 5454–5456, <https://doi.org/10.1021/ja01529a051>, 1959.
- 164 Chan, A. W. H., Kautzman, K. E., Chhabra, P. S., Surratt, J. D., Chan, M. N., Crouse, J. D., Kürten, A.,  
165 Wennberg, P. O., Flagan, R. C., and Seinfeld, J. H.: Secondary organic aerosol formation from  
166 photooxidation of naphthalene and alkylnaphthalenes: Implications for oxidation of intermediate  
167 volatility organic compounds (IVOCs), *Atmos Chem Phys*, 9, 3049–3060,  
168 <https://doi.org/10.5194/acp-9-3049-2009>, 2009.
- 169 Chan, A. W. H., Chan, M. N., Surratt, J. D., Chhabra, P. S., Loza, C. L., Crouse, J. D., Yee, L. D.,  
170 Flagan, R. C., Wennberg, P. O., and Seinfeld, J. H.: Role of aldehyde chemistry and NO<sub>x</sub>  
171 concentrations in secondary organic aerosol formation, *Atmos Chem Phys*, 10, 7169–7188,  
172 <https://doi.org/10.5194/ACP-10-7169-2010>, 2010.
- 173 Charan, S. M., Buenconsejo, R. S., and Seinfeld, J. H.: Secondary organic aerosol yields from the  
174 oxidation of benzyl alcohol, *Atmos Chem Phys*, 20, 13167–13190,  
175 <https://doi.org/10.5194/acp-20-13167-2020>, 2020.
- 176 Harvey, R. M. and Petrucci, G. A.: Control of ozonolysis kinetics and aerosol yield by nuances in the  
177 molecular structure of volatile organic compounds, *Atmos Environ*, 122, 188–195,  
178 <https://doi.org/10.1016/j.atmosenv.2015.09.038>, 2015.
- 179 Lee, S. C. and Wang, B.: Characteristics of emissions of air pollutants from burning of incense in a

180 large environmental chamber, *Atmos Environ*, 38, 941–951,  
181 <https://doi.org/10.1016/j.atmosenv.2003.11.002>, 2004.

182 Li, L., Tang, P., Nakao, S., and Cocker, D. R.: Impact of molecular structure on secondary organic  
183 aerosol formation from aromatic hydrocarbon photooxidation under low-NO<sub>x</sub> conditions, *Atmos*  
184 *Chem Phys*, 16, 10793–10808, <https://doi.org/10.5194/acp-16-10793-2016>, 2016.

185 Liu, T., Wang, Z., Huang, D. D., Wang, X., and Chan, C. K.: Significant Production of Secondary  
186 Organic Aerosol from Emissions of Heated Cooking Oils, *Environ Sci Technol Lett*, 5, 32–37,  
187 <https://doi.org/10.1021/acs.estlett.7b00530>, 2018.

188 Loza, C. L., Craven, J. S., Yee, L. D., Coggon, M. M., Schwantes, R. H., Shiraiwa, M., Zhang, X.,  
189 Schilling, K. A., Ng, N. L., Canagaratna, M. R., Ziemann, P. J., Flagan, R. C., and Seinfeld, J. H.:  
190 Secondary organic aerosol yields of 12-carbon alkanes, *Atmos Chem Phys*, 14, 1423–1439,  
191 <https://doi.org/10.5194/acp-14-1423-2014>, 2014.

192 Manoukian, A., Buiron, D., Temime-Roussel, B., Wortham, H., and Quivet, E.: Measurements of  
193 VOC/SVOC emission factors from burning incenses in an environmental test chamber: influence of  
194 temperature, relative humidity, and air exchange rate, *Environmental Science and Pollution Research*,  
195 23, 6300–6311, <https://doi.org/10.1007/s11356-015-5819-2>, 2016.

196 Matsunaga, A., Docherty, K. S., Lim, Y. B., and Ziemann, P. J.: Composition and yields of secondary  
197 organic aerosol formed from OH radical-initiated reactions of linear alkenes in the presence of NO<sub>x</sub>:  
198 Modeling and measurements, *Atmos Environ*, 43, 1349–1357,  
199 <https://doi.org/10.1016/j.atmosenv.2008.12.004>, 2009.

200 McDonald, B. C., De Gouw, J. A., Gilman, J. B., Jathar, S. H., Akherati, A., Cappa, C. D., Jimenez, J.  
201 L., Lee-Taylor, J., Hayes, P. L., McKeen, S. A., Cui, Y. Y., Kim, S. W., Gentner, D. R.,  
202 Isaacman-VanWertz, G., Goldstein, A. H., Harley, R. A., Frost, G. J., Roberts, J. M., Ryerson, T. B.,  
203 and Trainer, M.: Volatile chemical products emerging as largest petrochemical source of urban organic  
204 emissions, *Science (1979)*, 359, 760–764, <https://doi.org/10.1126/science.aaq0524>, 2018.

205 Nimlos, M. R., Qian, X., Davis, M., Himmel, M. E., and Johnson, D. K.: Energetics of xylose  
206 decomposition as determined using quantum mechanics modeling, *Journal of Physical Chemistry A*,  
207 110, 11824–11838, <https://doi.org/10.1021/jp0626770>, 2006.

208 Shah, R. U., Coggon, M. M., Gkatzelis, G. I., McDonald, B. C., Tasoglou, A., Huber, H., Gilman, J.,  
209 Warneke, C., Robinson, A. L., and Presto, A. A.: Urban Oxidation Flow Reactor Measurements Reveal  
210 Significant Secondary Organic Aerosol Contributions from Volatile Emissions of Emerging  
211 Importance, *Environ Sci Technol*, 54, 714–725, <https://doi.org/10.1021/acs.est.9b06531>, 2020.

212 Tkacik, D. S., Presto, A. A., Donahue, N. M., and Robinson, A. L.: Secondary organic aerosol  
213 formation from intermediate-volatility organic compounds: Cyclic, linear, and branched alkanes,  
214 *Environ Sci Technol*, 46, 8773–8781, <https://doi.org/10.1021/es301112c>, 2012.

215 Wu, W., Zhao, B., Wang, S., and Hao, J.: Ozone and secondary organic aerosol formation potential  
216 from anthropogenic volatile organic compounds emissions in China, *J Environ Sci (China)*, 53, 224–  
217 237, <https://doi.org/10.1016/j.jes.2016.03.025>, 2017.

218 Yang, T. T., Lin, T. S., and Chang, M.: Characteristics of emissions of volatile organic compounds  
219 from smoldering incense, *Bull Environ Contam Toxicol*, 78, 308–313,  
220 <https://doi.org/10.1007/s00128-007-9184-9>, 2007.

221 Zhao, Y., Hennigan, C. J., May, A. A., Tkacik, D. S., De Gouw, J. A., Gilman, J. B., Kuster, W. C.,  
222 Borbon, A., and Robinson, A. L.: Intermediate-volatility organic compounds: A large source of  
223 secondary organic aerosol, *Environ Sci Technol*, 48, 13743–13750, <https://doi.org/10.1021/es5035188>,  
224 2014.

225 Zhao, Y., Saleh, R., Saliba, G., Presto, A. A., Gordon, T. D., Drozd, G. T., Goldstein, A. H., Donahue,  
226 N. M., and Robinson, A. L.: Reducing secondary organic aerosol formation from gasoline vehicle  
227 exhaust, *Proc Natl Acad Sci U S A*, 114, 6984–6989, <https://doi.org/10.1073/pnas.1620911114>, 2017.

228 Zushi, Y., Yamatori, Y., Nagata, J., and Nabi, D.: Comprehensive two-dimensional  
229 gas-chromatography-based property estimation to assess the fate and behavior of complex mixtures: A  
230 case study of vehicle engine oil, *Science of the Total Environment*, 669, 739–745,  
231 <https://doi.org/10.1016/j.scitotenv.2019.03.157>, 2019.

232
